# Supplementary material for: Identification of transcription factor binding sites using ATAC-seq
Source: PubMed Central journal article supplement (PMC6391789; doi:10.1186/s13059-019-1642-2), 2019-02-26
Supplement: 13059_2019_1642_MOESM1_ESM.pdf [file 13059_2019_1642_MOESM1_ESM.pdf]

# Additional file 1 for Identification of Transcription Factor Binding Sites using ATAC-seq

Zhijian Li<sup>1,2</sup>, Marcel H. Schulz<sup>3,4</sup>, Thomas Look<sup>2,5</sup>, Matthias Begemann<sup>6</sup>, Martin Zenke<sup>2,5</sup>, and Ivan G. Costa<sup>\*1,5</sup>

<sup>1</sup>Institute for Computational Genomics, Joint Research Center for Computational Biomedicine, RWTH Aachen University Medical School, Aachen, Germany.

<sup>2</sup>Department of Cell Biology, Institute of Biomedical Engineering, RWTH Aachen University Medical School, Aachen, Germany.

<sup>3</sup>Cluster of Excellence for Multimodal Computing and Interaction, Saarland Informatics Campus, Saarland University, Saarbrücken, Germany

<sup>4</sup>Computational Biology & Applied Algorithmics, Max Planck Institute for Informatics, Saarbrücken, Germany

<sup>5</sup>Helmholtz Institute for Biomedical Engineering, RWTH Aachen University, Aachen, Germany

<sup>6</sup>Institute of Human Genetics, RWTH Aachen University Medical School, Aachen, Germany

January 16, 2019

---

\*ivan.costa@rwth-aachen.de

# 1 Supplementary Methods

## 1.1 HMM Training

A HMM is specified by the following parameters:

1.  $S = s_1 s_2 \dots s_N$ : a set of hidden states
2.  $\pi = (\pi_1 \pi_2 \dots \pi_N)$ : initial state probabilities
3.  $A = \{a_{ij} | i = 1, \dots, N; j = 1, \dots, N\}$ : a state transition probability matrix where  $a_{ij} = P(s_{t+1} = j | s_t = i)$  and  $\sum_{j=1}^N a_{ij} = 1$
4.  $B = \{b_n(x_t) | n = 1, \dots, N; t = 1, \dots, T\}$ : emission probability where  $b_n(x_t) = P(x_t | s_t = n)$  is a full covariance  $o$ -dimensional Gaussian distribution and  $x_t$  comes from an observation sequence  $X = (x_1, \dots, x_t, \dots, x_T)$ , where  $x_t$  is a  $o$ -dimensional vector with signals given as input for the HMM and  $o$  varies from 2 to 12 depending of the signal generation strategy.

For simplification, we use  $\lambda = (\pi, A, B)$  to indicate the full parameter set of a HMM. Given an observation sequence, i.e., ATAC-seq digestion profiles, we will learn the  $\lambda$  by maximizing the likelihood function  $P(X|\lambda)$  using 'semi-supervised' learning .

We start the training with some initial estimate of  $\lambda$  and calculate the forward variable  $\alpha_t(i)$  as:

$$\alpha_t(i) = P(x_1, x_2, \dots, x_t, q_t(i) | \lambda) \quad (1)$$

and backward variable  $\beta_t(i)$  as:

$$\beta_t(i) = P(x_{t+1}, x_{t+2}, \dots, x_T | q_t(i), \lambda). \quad (2)$$

We can now calculate the probability of being state  $i$  at observed sequence position  $t$  as:

$$\gamma_t(i) = P(x_t = i | X, \lambda) = \frac{P(x_t = i, X | \lambda)}{P(X | \lambda)} = \frac{\alpha_t(i) \beta_t(i)}{\sum_j \alpha_t(i) \beta_t(i)}. \quad (3)$$

and the probability of being state  $i$  at  $t$  and state  $j$  at  $t + 1$  given as  $\xi_t(i, j)$ :

$$\xi_t(i, j) = P(q_t(i), q_{t+1}(j) | X, \lambda) = \frac{\alpha_t(i) a_{ij} b_j(t+1) \beta_{t+1}(j)}{P(X | \lambda)} = \frac{\alpha_t(i) a_{ij} b_j(t+1) \beta_{t+1}(j)}{\sum_{i=1}^N \sum_{j=1}^N \alpha_t(i) a_{ij} b_j(t+1) \beta_{t+1}(j)} \quad (4)$$

We have, in our training data, labels corresponding to the footprint state. We use therefore a semi-supervised approach that constraints training for the footprint state to be performed by the normal ML estimates, while other states are estimates with the Baum-welch. This can be obtained by fixing the posterior distribution estimation and follows the framework from (Zhong

2005). Specifically, given an observed sequence  $(x_1, x_2, \dots, x_T)$  with an annotated footprint sub-sequence  $(x_m, x_{m+1}, \dots, x_n)$ , where  $1 \leq n \leq m \leq T$ , for  $\gamma_t(i)$ , the following fixing procedure is used:

$$\gamma'_t(i) = \begin{cases} 0, & \text{if } i \neq s_{fp} \text{ and } t < m \text{ or } t > n, \text{ or } i \neq s_{fp} \text{ and } m \leq t \leq n \\ 1, & \text{if } i = s_{fp} \text{ and } m \leq t \leq n \\ \frac{\gamma_t(i)}{\sum_{i \neq s_{fp}}^N \gamma_t(i)}, & \text{otherwise} \end{cases} \quad (5)$$

where  $s_{fp}$  is the pre-defined footprint state and  $\xi'_t(i, j)$  can be obtained using a similar procedure. In doing so, we correct the expectation estimates by distinguishing the states as footprint state and non-footprint states. Next, the transition probability  $a_{ij}$  can be estimated as:

$$\hat{a}_{ij} = \frac{\sum_{t=1}^{T-1} \xi'_t(i, j)}{\sum_{t=1}^{T-1} \sum_{k=1}^N \xi'_t(i, k)} \quad (6)$$

the initial state probabilities can be estimated as:

$$\hat{\pi}_i = \sum_{j=1}^N \xi'_1(i, j) \quad (7)$$

The observation values of state  $i$  are assumed to have a multivariate Gaussian distribution with density function:

$$p(x^i; \mu^i, \Sigma^i) = \frac{1}{(2\pi)^2 |\Sigma^i|^{1/2}} \exp\left(-\frac{1}{2}(x^i - \mu^i)^T (\Sigma^i)^{-1} (x^i - \mu^i)\right) \quad (8)$$

Finally, the mean  $\mu^i$  and covariance matrix  $\Sigma^i$  can be estimated as:

$$\hat{\mu}^i = \frac{\sum_{t=1}^T \gamma'_t(i) x_t}{\sum_{t=1}^T \gamma'_t(i)} \quad (9)$$

$$\hat{\Sigma}^i = \frac{s + \sum_{t=1}^T \gamma'_t(i) (x_t - \hat{\mu}^i)(x_t - \hat{\mu}^i)^T}{\sum_{t=1}^T \gamma'_t(i)} \quad (10)$$

where  $s$  is set to 0.01.

## 1.2 Competing methods

PIQ (Sherwood et al. 2014) implementation was obtained from <http://piq.csail.mit.edu> and executed with the default parameters, which can be found in the script `common.r`. Briefly, MPBSs were generated with the script `pwmmatch.exact.r`. The DNase-seq or ATAC-seq signal was created using the script `bam2rdata.r`. The footprints were detected with the script `pertf.r`. DNase2TF (Sung et al. 2014) source code was obtained from <http://sourceforge.net/projects/dnase2tfr/> and executed with the default 4-mer sequence bias correction. The parameters were set to their default values: `minw`, 6; `maxw`, 30; `z_threshold`, 2; `FDRs`,  $10^{-3}$ . DeFCoM (Quach and Furey 2016) was downloaded from <https://bitbucket.org/bryancquach/>

`defcom`. Since it is a supervised footprint detection method, we split the dataset into 5 folds and perform training and prediction on each fold, then we merge all predictions for each cell as the final result. Wellington's source code (Piper et al. 2013) was downloaded from <http://jppiper.github.com/pyDNase> and executed with default parameters. Briefly, we used a footprint FDR cutoff of 30, footprint sizes varying between 6 and 40 with 1 bp steps and shoulder size (flanking regions) of 35 bp.

## Tn5 cleavage logo

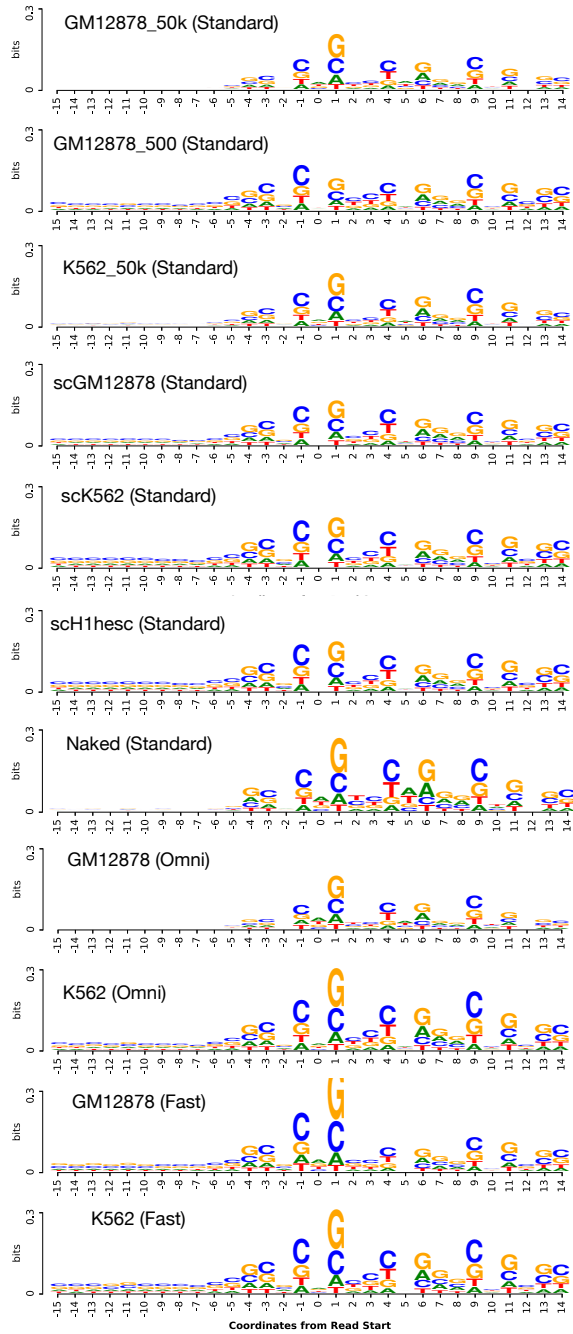

## DNase I cleavage logo

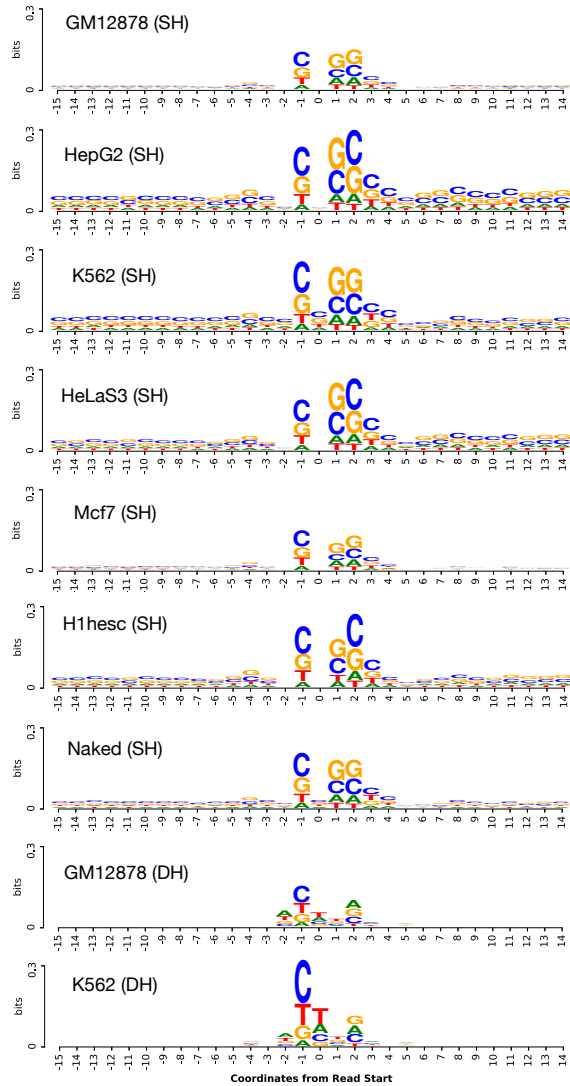

Figure S1: Cleavage logo corresponding to Tn5 and DNase I binding as measured on distinct ATAC-seq (standard, Omni and Fast) and DNase-seq [single hit (SH) and double hit (DH)] protocols and cells. Position 1 corresponds to the start position of the ATAC/DNase-seq read. Libraries from ATAC-seq, DNase-seq SH or DNase-seq DH protocols have small variations of the same motif.

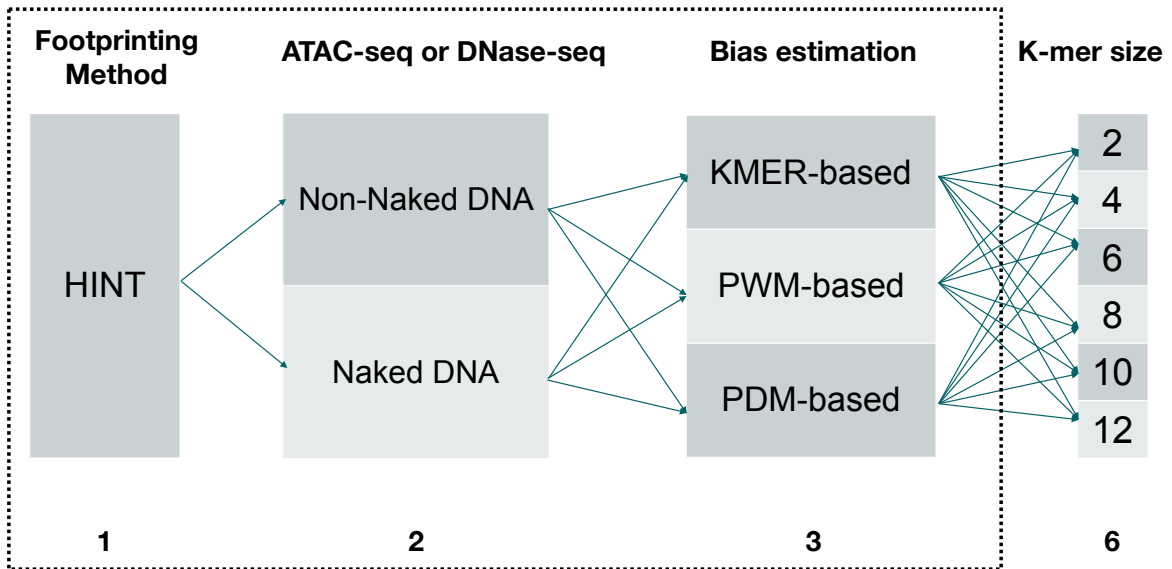

Figure S2: Experimental design for evaluation of bias correction methods on GM12878 cells. We evaluate all 36 methods/parameters depicted above. We first select the best k-mer size for each combination of experiment and bias estimation methods (6 combinations inside the dashboard) and then compare the remaining combinations. The above selection of bias correction methods is independently performed for each ATAC-seq and DNase-seq protocol.

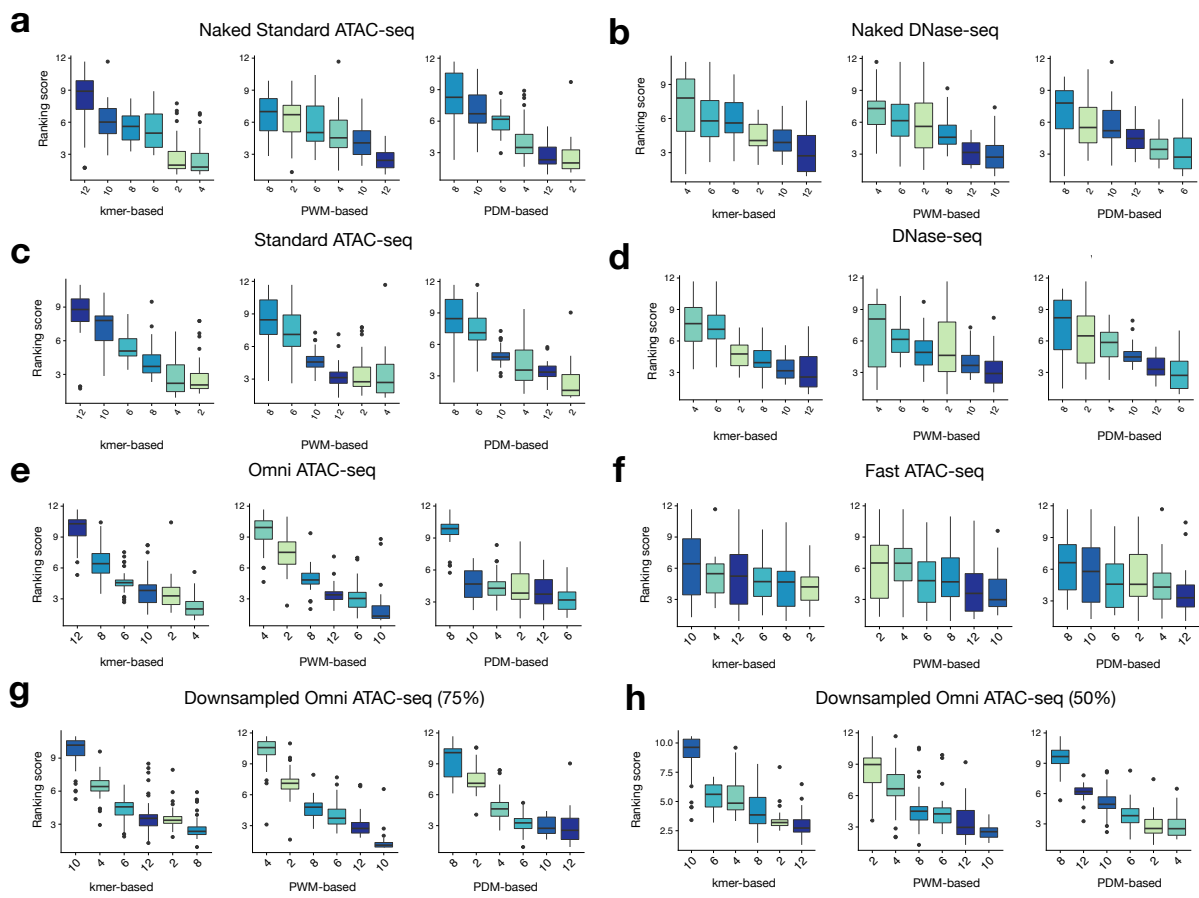

Figure S3: Ranking score contrasting the word size used for each combination of bias correction methods for naked ATAC-seq (a), naked DNase-seq (b), standard ATAC-seq (c), DNase-seq (d), Omni ATAC-seq (e), Fast ATAC-seq (f), Omni ATAC-seq libraries downsampled to have only 75 % (g) and 50% (h) of reads. All experiments are based on GM12878 cells.

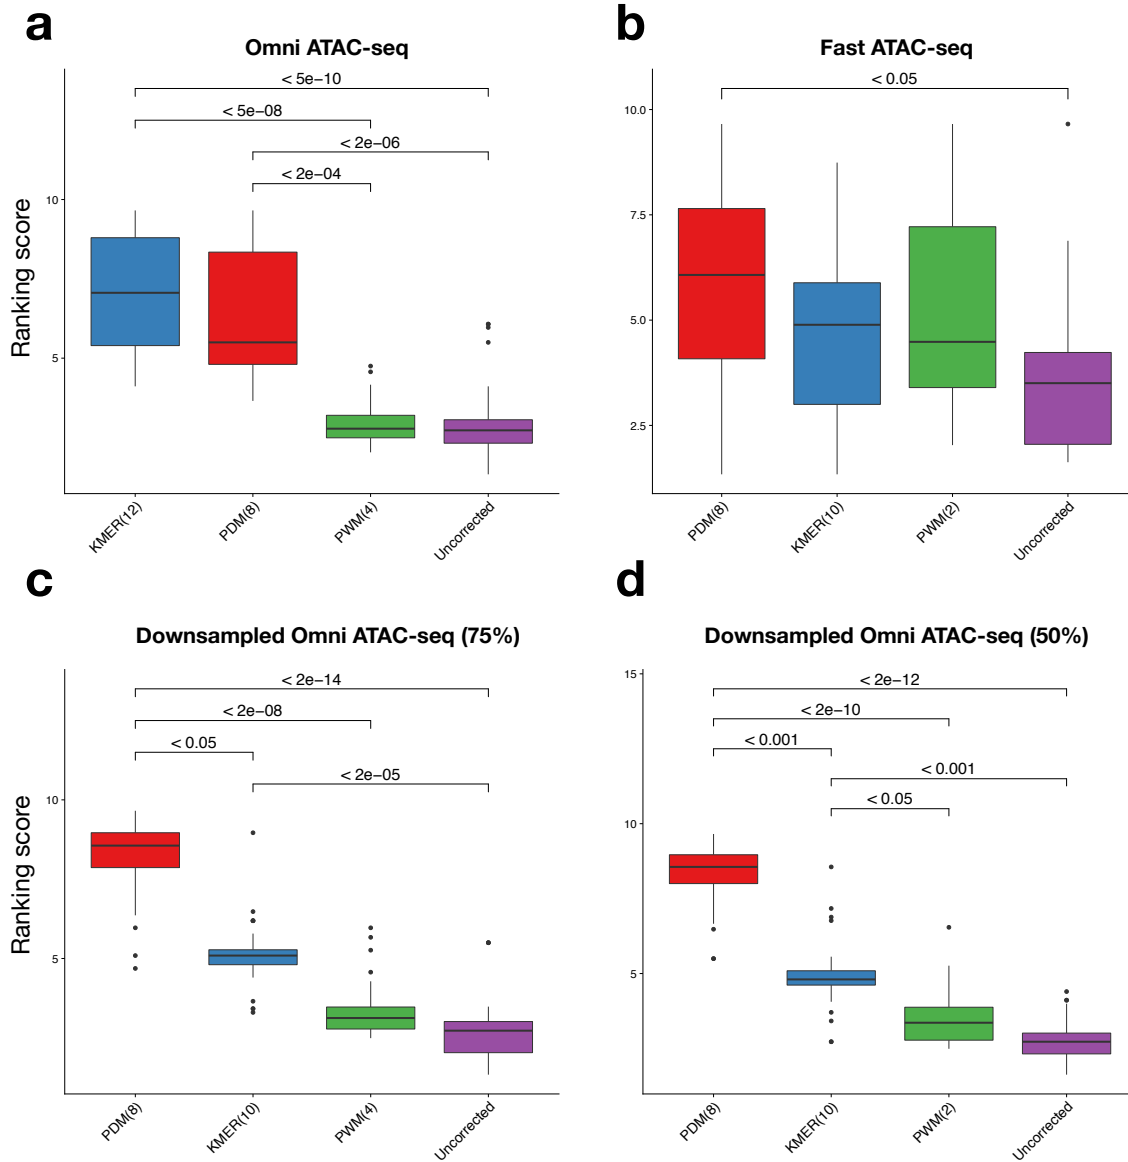

Figure S4: Ranking score contrasting the bias estimation methods for Omni ATAC-seq (a), Fast ATAC-seq (b), Omni ATAC-seq downsampled to 75 % (c) and 50 % (d). We selected the best word size ( $k$ ) for each method according to the comparison results of Fig. S3 (see Tables S1-S12 for statistics test results).



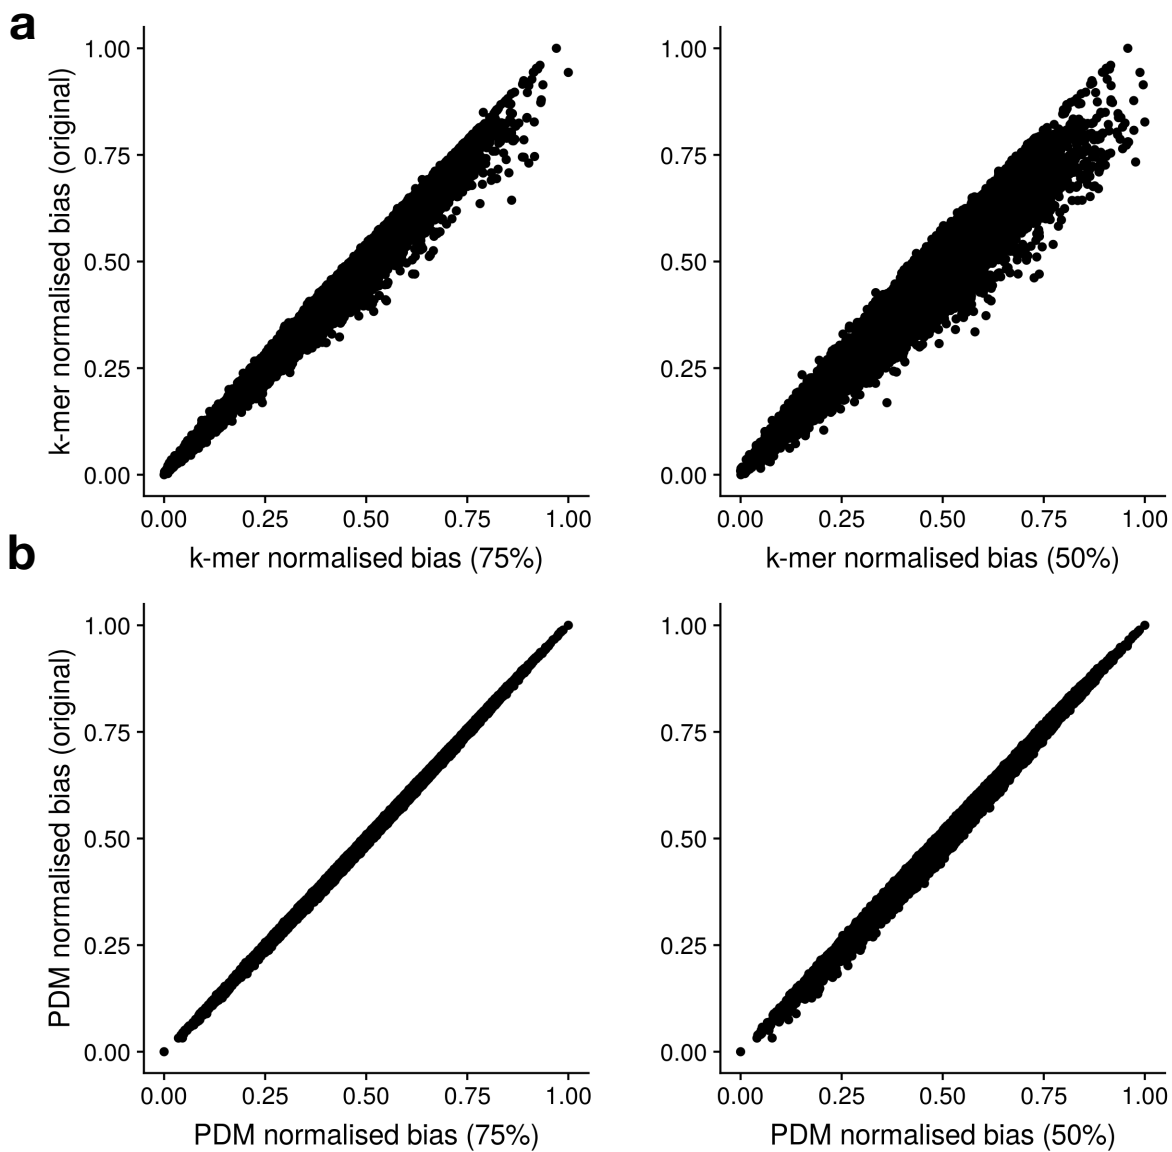

Figure S5: Scatter plot with normalised cleavage bias estimates of  $k$ -mer (a) and PDM (b) models for the original GM12878 Omni-ATAC-seq library ( $y$ -axis) vs. downsampled versions with 75% or 50% of reads ( $x$ -axis). This Omni ATAC-seq has originally 70 million reads. Bias estimates were normalised as in Lazarovici et al. (2013). We observe higher variance in bias estimates for  $k$ -mer based approach than for PDM based approach.

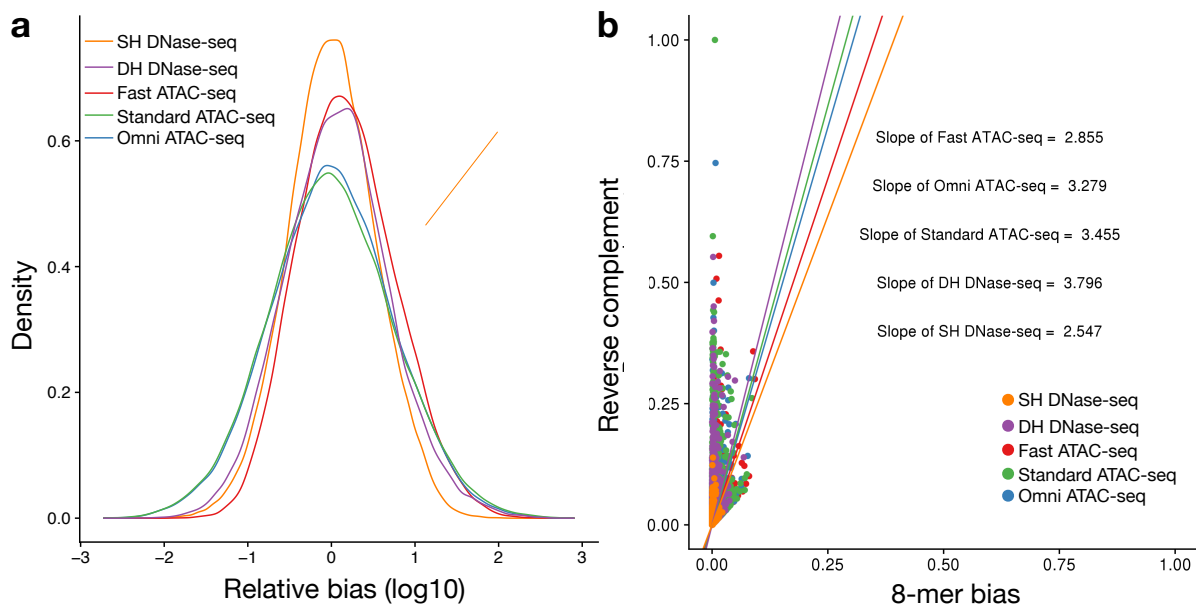

Figure S6: (a) Distribution of 8-mers bias estimates from PDM for distinct protocols in GM12878 cells. Relative bias (x-axis) corresponds to log transformed values from Eq. 2 (main manuscript). We observe that DNase-seq estimates are closer to zero than ATAC-seq protocols. This indicates higher relative bias of Tn5 enzyme than DNase-I for particular k-mers. (b) Normalised PDM cleavage bias comparing of 8-mers (x-axis) and its reverse complement (y-axis). Palindromic sequences are ignored and only points above the diagonal are show as in Lazarovici et al. (2013). Fitted slopes indicates that estimates are distributed far from the diagonal, which supports the non-palindromic nature of both Tn5 and DNase-I bias estimates.

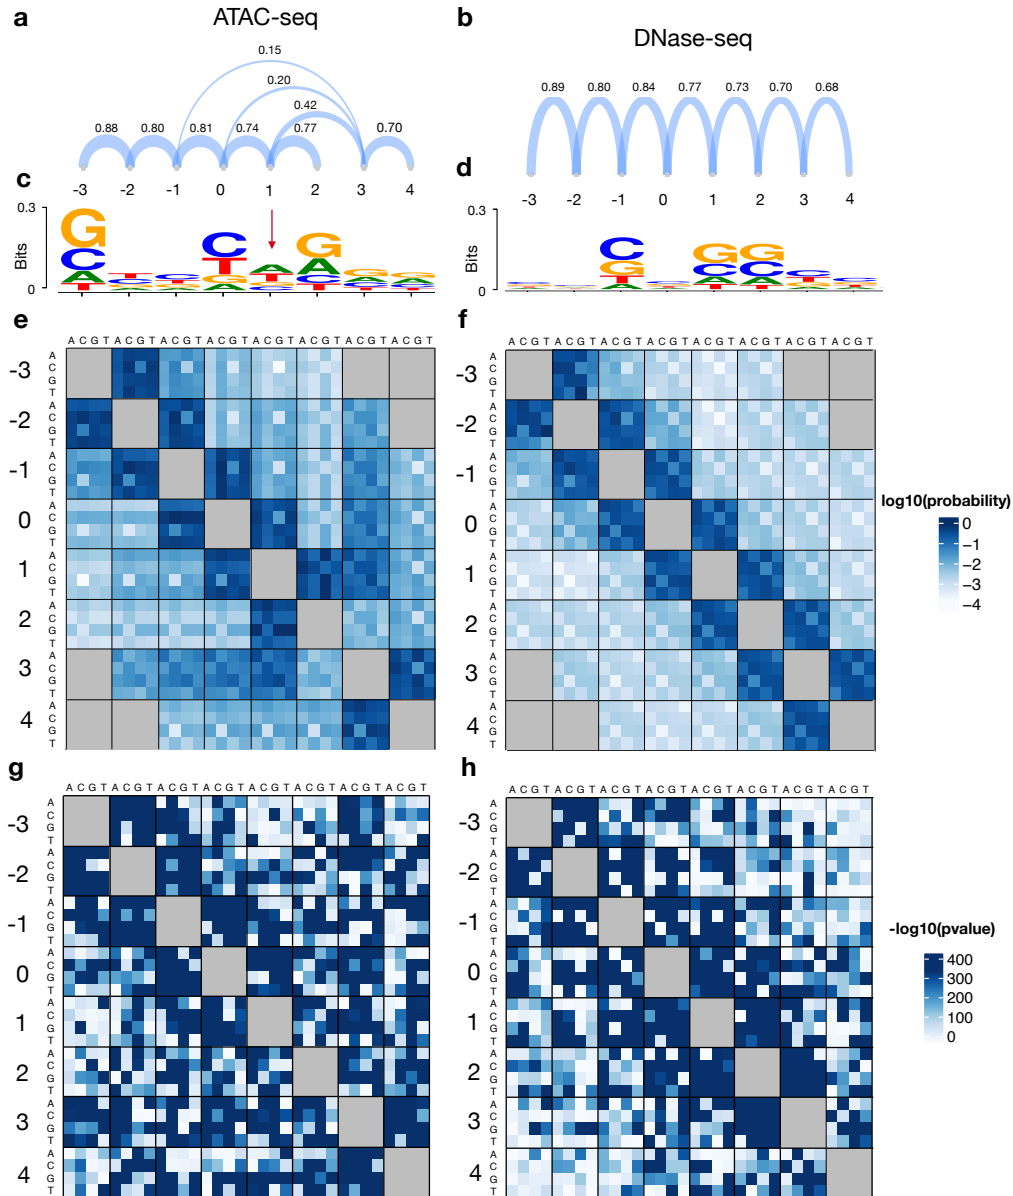

Figure S7: Dependencies considered by PDM model [parameter  $p(C_j)$  in Eq. 7 of main text] for standard ATAC-seq (a) and DNase-seq (b) in GM12878 cells. Position 1 corresponds to the digestion event, i.e. position 5 of a forward ATAC-seq read and first position of a DNase-seq read. Only dependencies with  $p > 0.1$  are shown. Logos corresponding to these positions (c-d). Interestingly, first order dependencies are relevant for both protocols. However, for ATAC-seq, higher order dependencies are considered among positions -1,0,1 and position 3. These dependencies are reflected in the conditional probabilities considered by PDM [parameter  $p(R_{ij})$  in Eq. 7 of main text] for ATAC-seq (e) and DNase-seq (f). Grey values indicate dependencies not considered by PDM (order higher than 5). Additionally, we performed the statistical test to measure dependencies between pairs of conditions proposed in Lazarovici et al. (2013) (g-h). We observed a similar dependency pattern as captured by PDM (e, f).

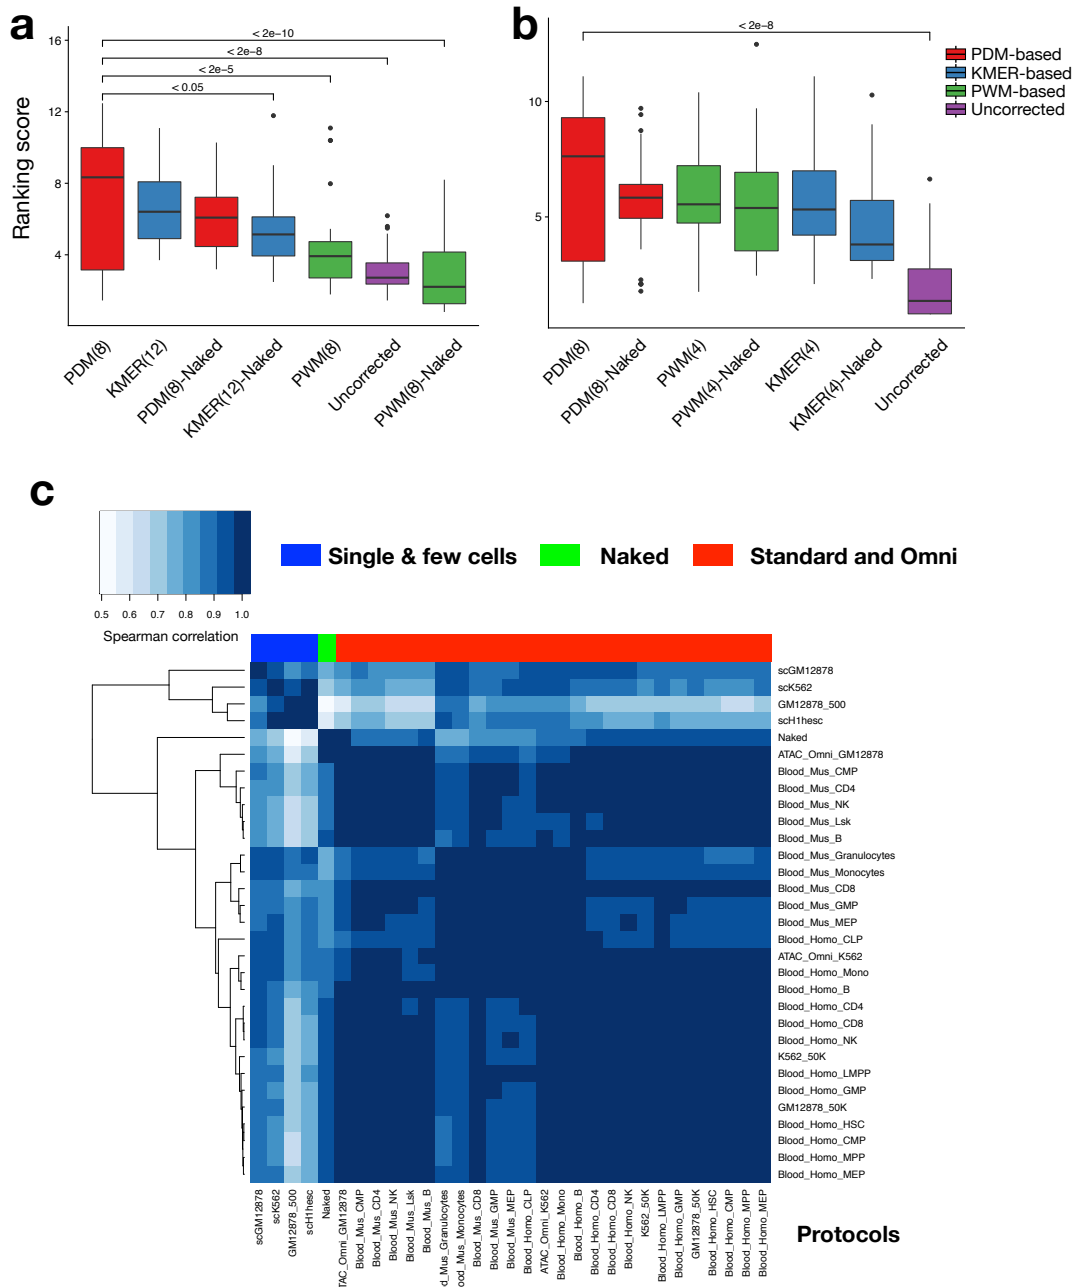

Figure S8: Comparison of bias estimation methods in standard ATAC-seq (a) and DNase-seq (b) on 32 TF ChIP-seq data sets from GM12878 cells. Bias estimates are either computed in the ATAC-seq libraries themselves or based on ATAC-seq performed in naked DNA (Naked). Overall, models based no Naked DNA performed worst (lowest rank) than the corresponding model using bias estimates from the GM12878 ATAC-seq library. (c) Hierarchical clustering of ATAC-seq bias estimates using PDM-based approach on several ATAC-seq libraries. Clustering is based on Spearman's rank correlation coefficient and McQuitty criteria between the sequence bias. We observed three clusters: one small cluster with single cell or experiments with few cells, a large cluster with all cells based on bulk cells (standard, Omni or Fast) and an outlier cluster based on a naked DNA experiment. The distinct bias in protocols with few cells can be an effect of over-digestion of chromatin by Tn5 (Buenrostro et al. 2015).

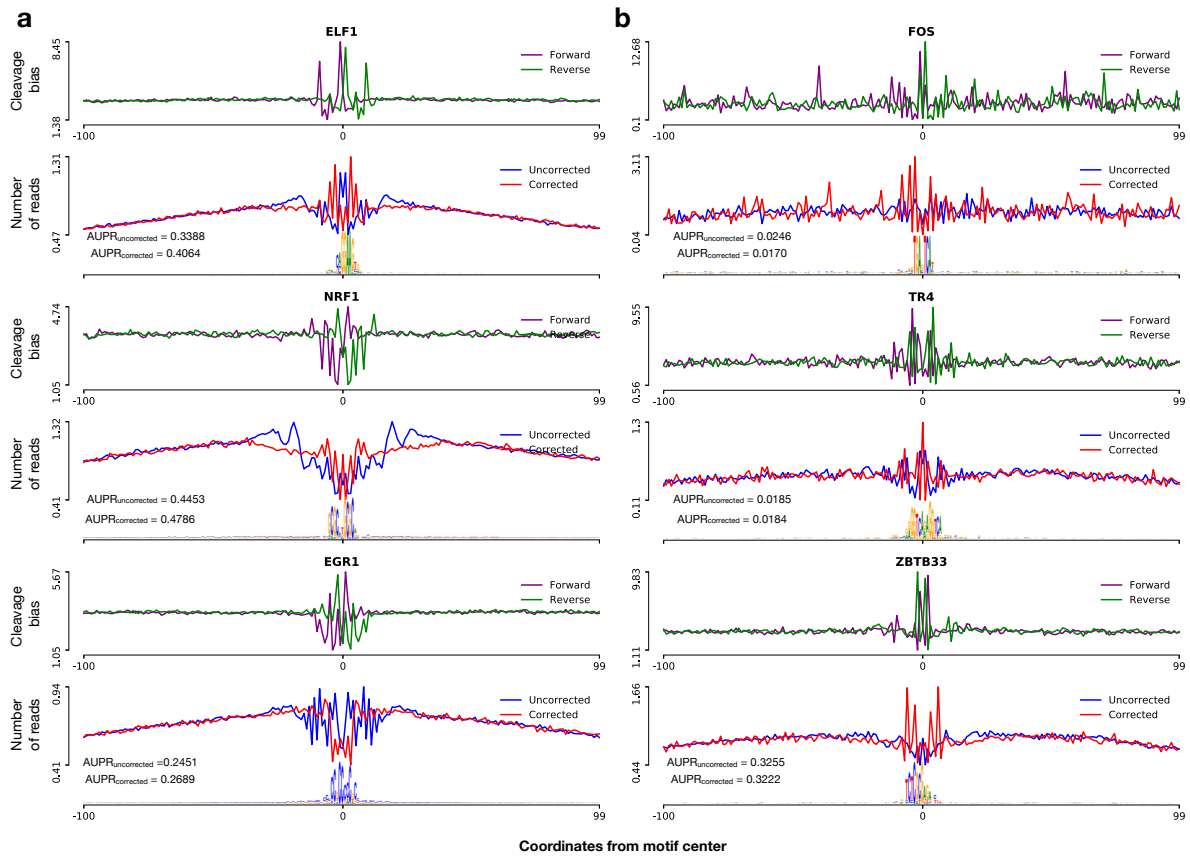

Figure S9: Strand specific cleavage bias with corrected (PDM based) and uncorrected ATAC-seq signal profiles around ChIP-seq supported binding sites of factors with an increase (a) and decrease (b) in AUPR after PDM based bias correction. All ATAC-seq profiles are based on GM12878 cells.

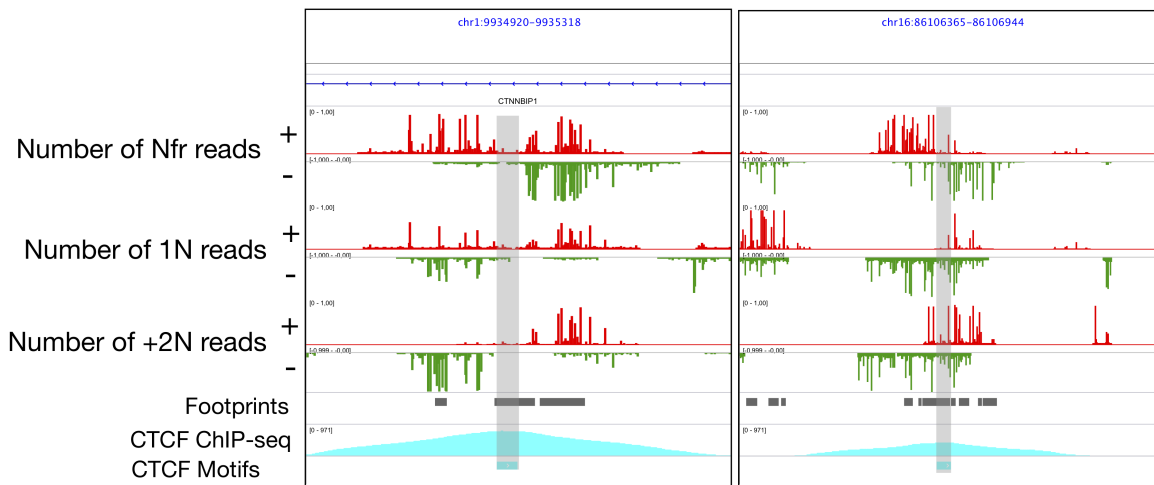

Figure S10: Strand specific Omni-ATAC-seq profiles around genomic regions with CTCF ChIP-seq supported binding sites in GM12878 cells. Figure also includes footprint predicted by HINT-ATAC, CTCF motifs and CTCF ChIP-seq signals. We observe higher number of forward reads (red) in Nfr signals left to CTCF, while more reverse reads (green) are seen right of CTCF for 1N and +2N signals.

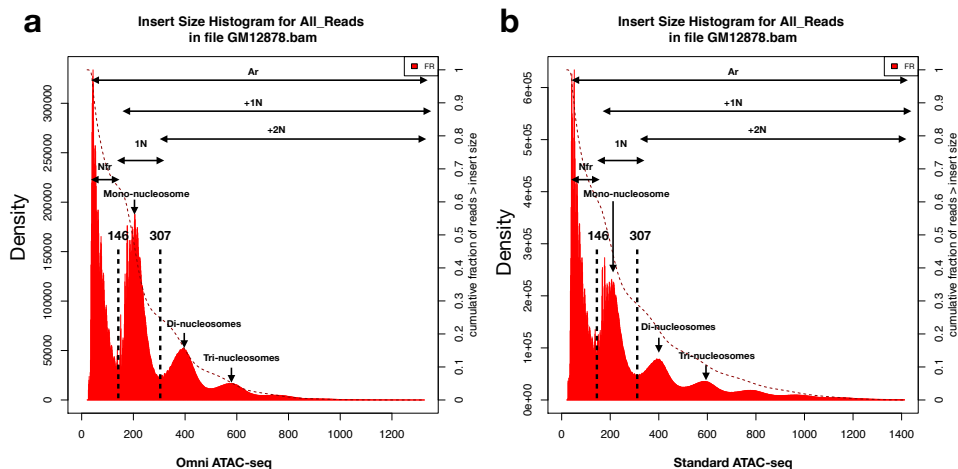

Figure S11: Distribution of fragment sizes for Omni ATAC-seq (a) and standard ATAC-seq (b) on GM12878. Cutoffs 146, and 307 are determined by searching for local minimum of fragment counts between the first three modes. Reads with size below 146 are considered nucleosome free (Nfr), reads between 146 and 307 are considered as mono-nucleosomes (1N) and above 146 are more than one nucleosomes(+1N), reads larger than 307 are considered to contain two or more nucleosomes (+2N). For Fast ATAC-seq, the optimal cutoffs are 122 and 295.

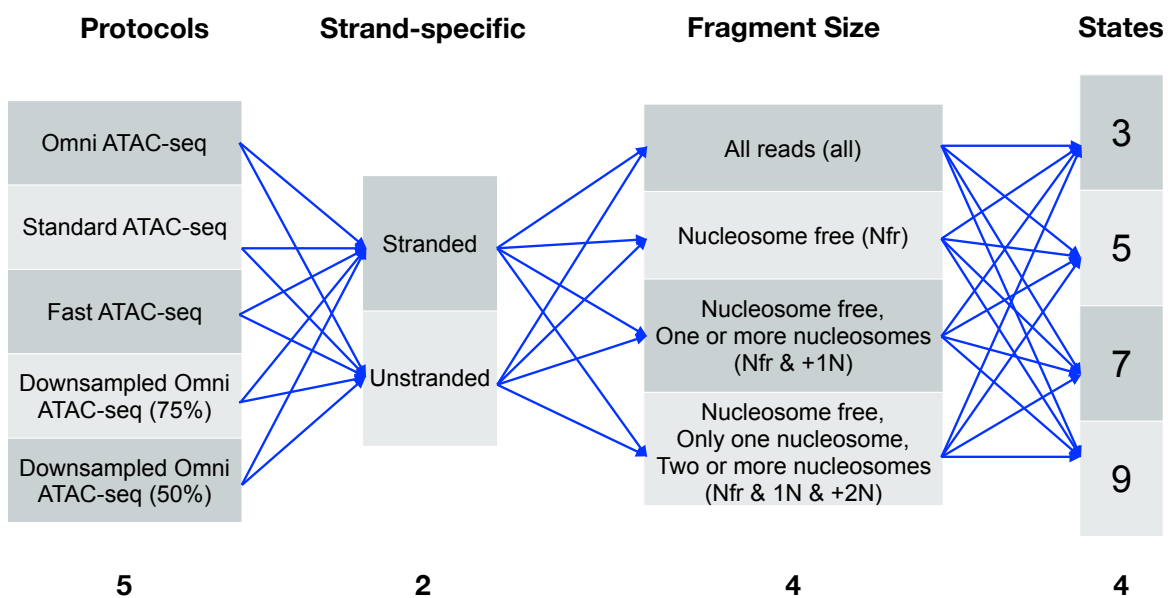

Figure S12: Experimental design for model selection of HINT-ATAC. We evaluate here models for Omni, standard, Fast ATAC-seq protocols and downsampled Omni ATAC-seq (75% and 50%). The models include strand specific and non-strand specific signals, four combinations of nucleosome decompositions and of HMM states.

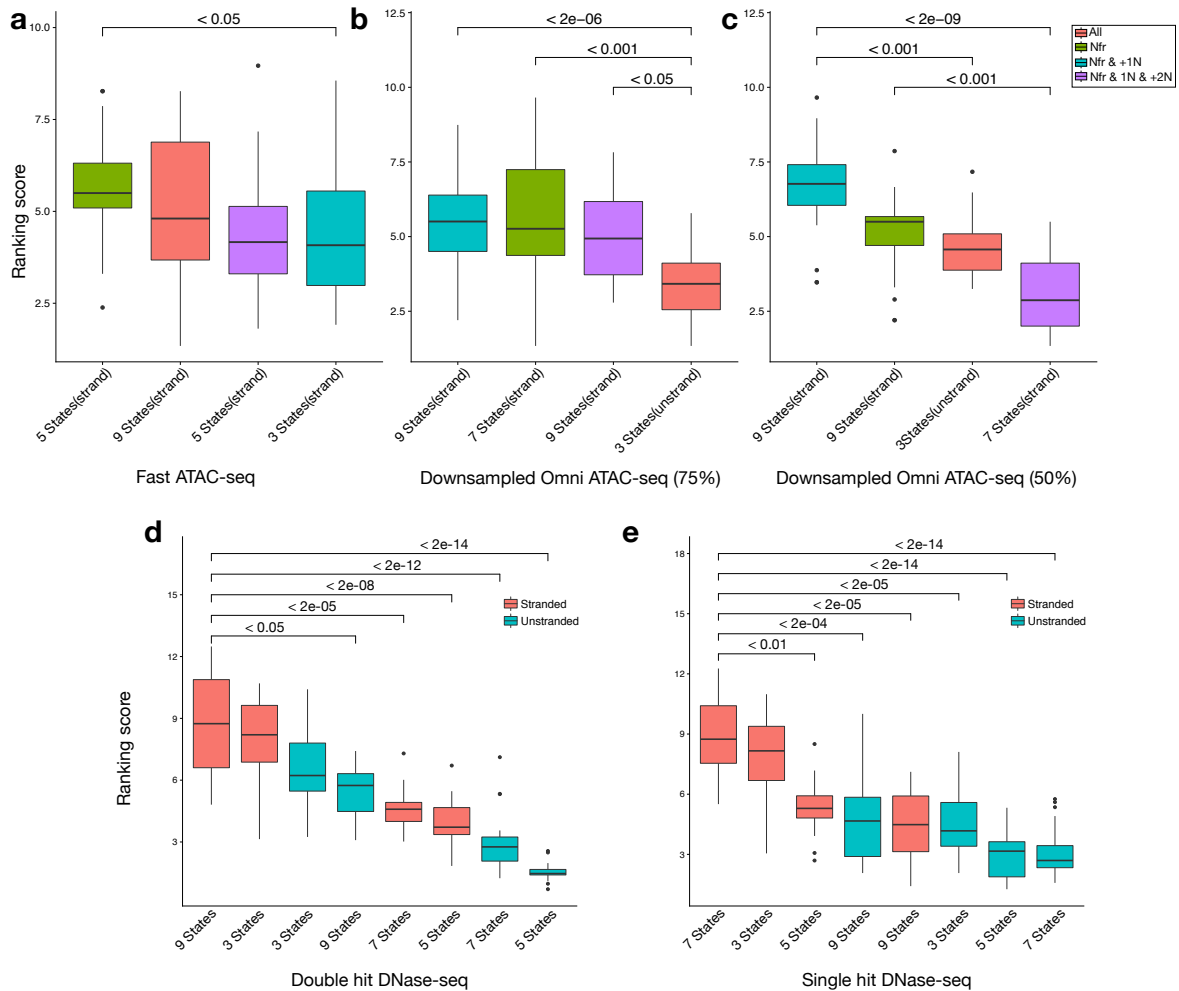

Figure S13: Ranking score contrasting the predictive performance of distinct signal decomposition strategies for Fast ATAC-seq (**a**) and downsampled Omni ATAC-seq (**b-c**) on GM12878 cells. Ranking score contrasting number of HMM states and the use of strand specific signals for data based on double hit DNase-seq (**d**) and single hit DNase-seq protocol (**e**). Nucleosome decomposition is not possible for DNase-seq given the lack of paired end DNase-seq libraries. The best models for each of this comparisons are used in further experiments for the given DNase/ATAC-seq protocol (see Table S17-S20 for complete results of statistics test).



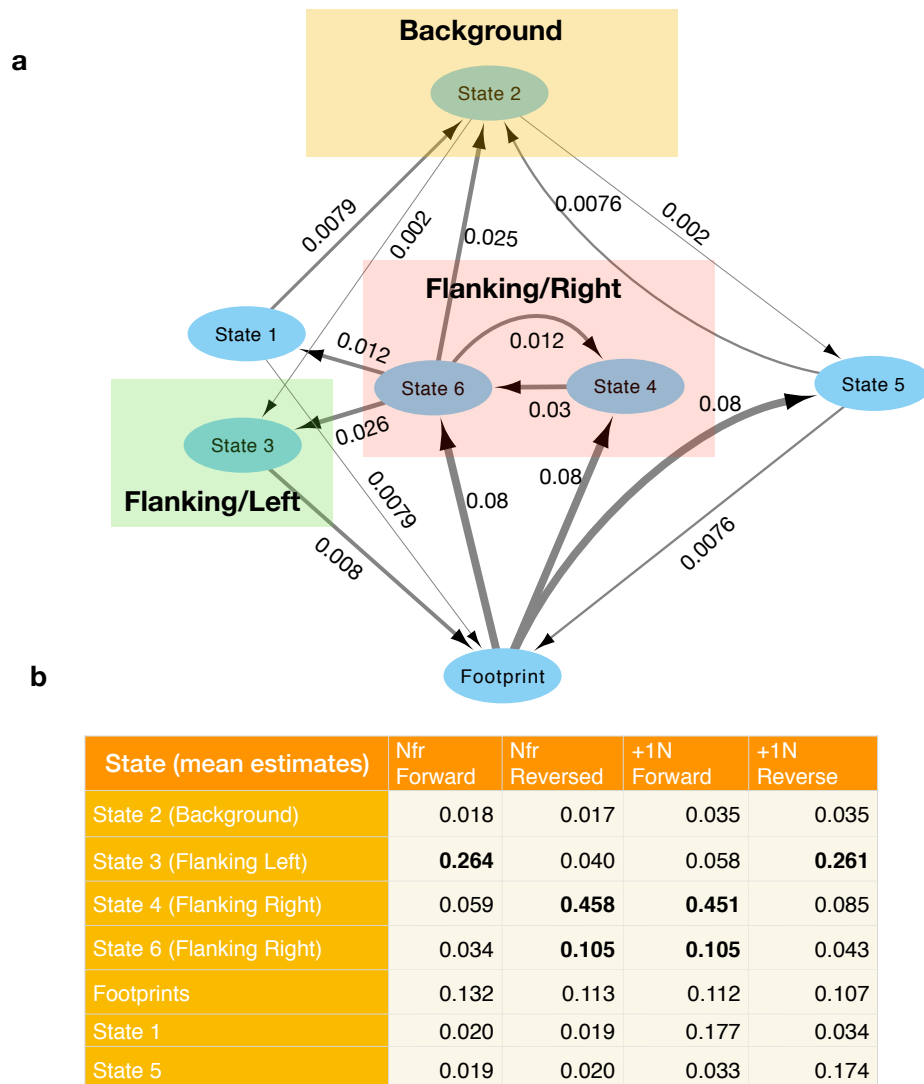

Figure S14: Transitions (a) probabilities and mean estimates (b) for the best HMM topology learned for Omni ATAC-seq. This HMM is based on 7 states and used strand specific Nfr and +1N decompositions as inputs. Self transitions are omitted. This HMM, which is trained using a semi-supervised approach with annotation of the footprint state, learns a state (2) for modelling background distribution with high self transition and low means for all signals, one state (3) associated to left flanking region with high Nfr Forward and +1N Reverse values and two states (4 and 6) associated to right flanking regions with high Nfr Reverse and +1N Forward values.

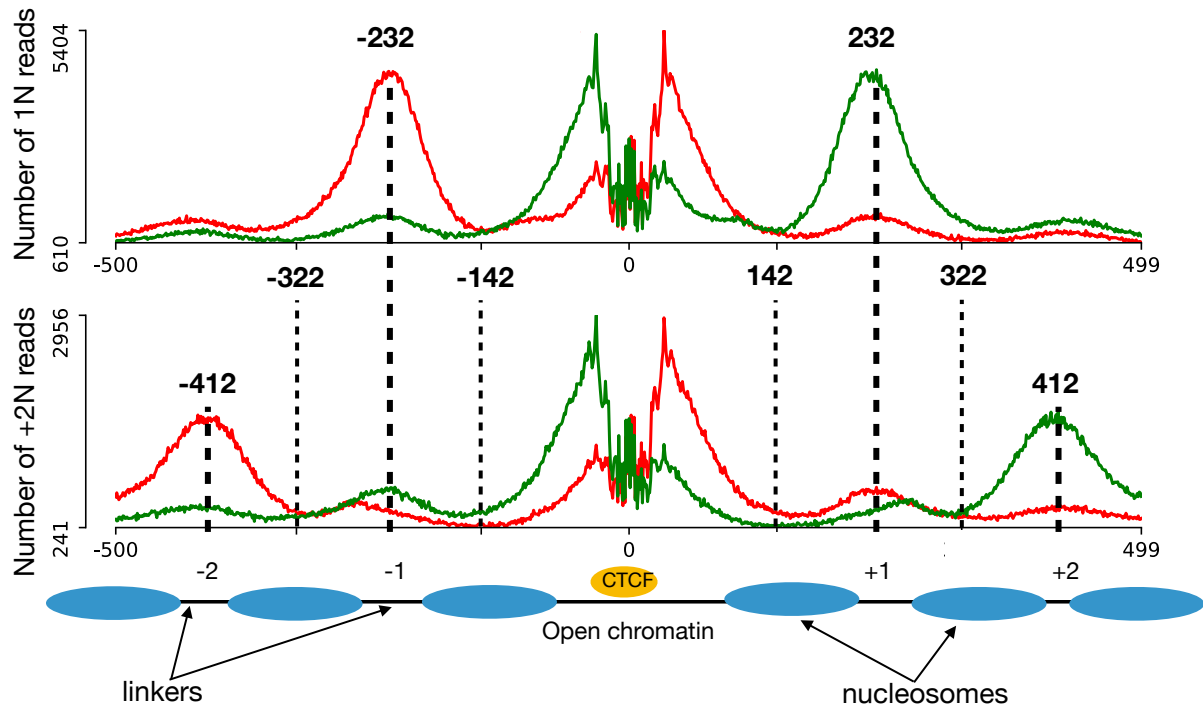

Figure S15: Calculation of the relative distance between binding site and the nucleosomes. We first estimate the position of -1, -2, +1, +2 linkers by searching for the local maximum values of smoothed 1N and +2N ATAC-seq signals. Given that the nucleosome core particle consists of approximately 146 base pairs (bp) of DNA, we then can estimate the linker size and finally obtain the relative distances.

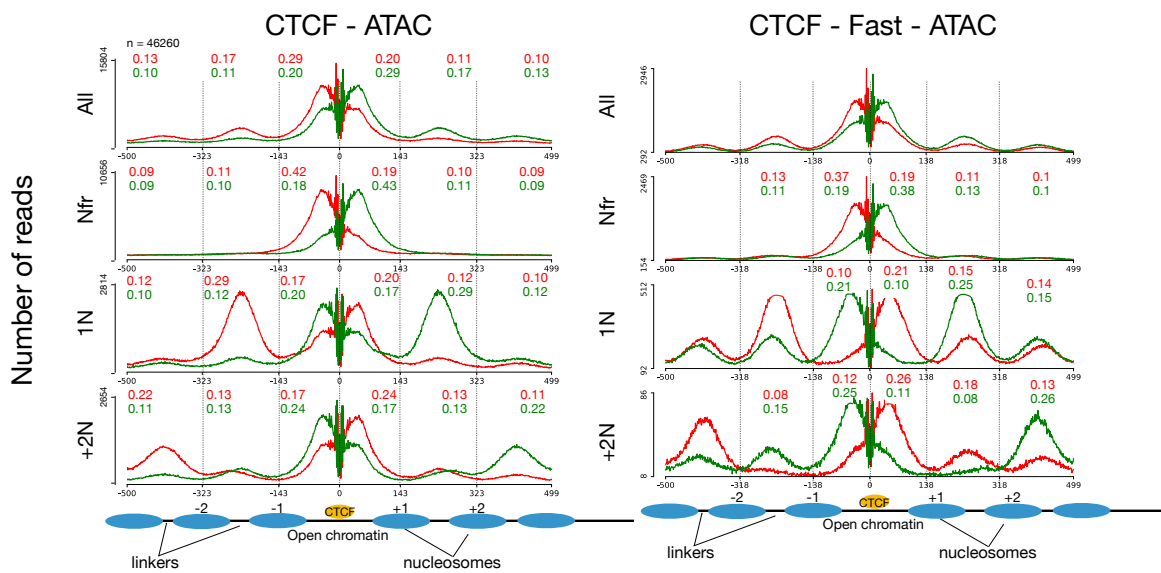

Figure S16: Strand specific and bias corrected cleavage signals for distinct fragment sizes around CTCF ChIP-seq peaks on GM12878 cells for standard and Fast ATAC-seq protocols. Strand patterns are similar to the ones in Omni-ATAC-seq (Main Fig. 4b).

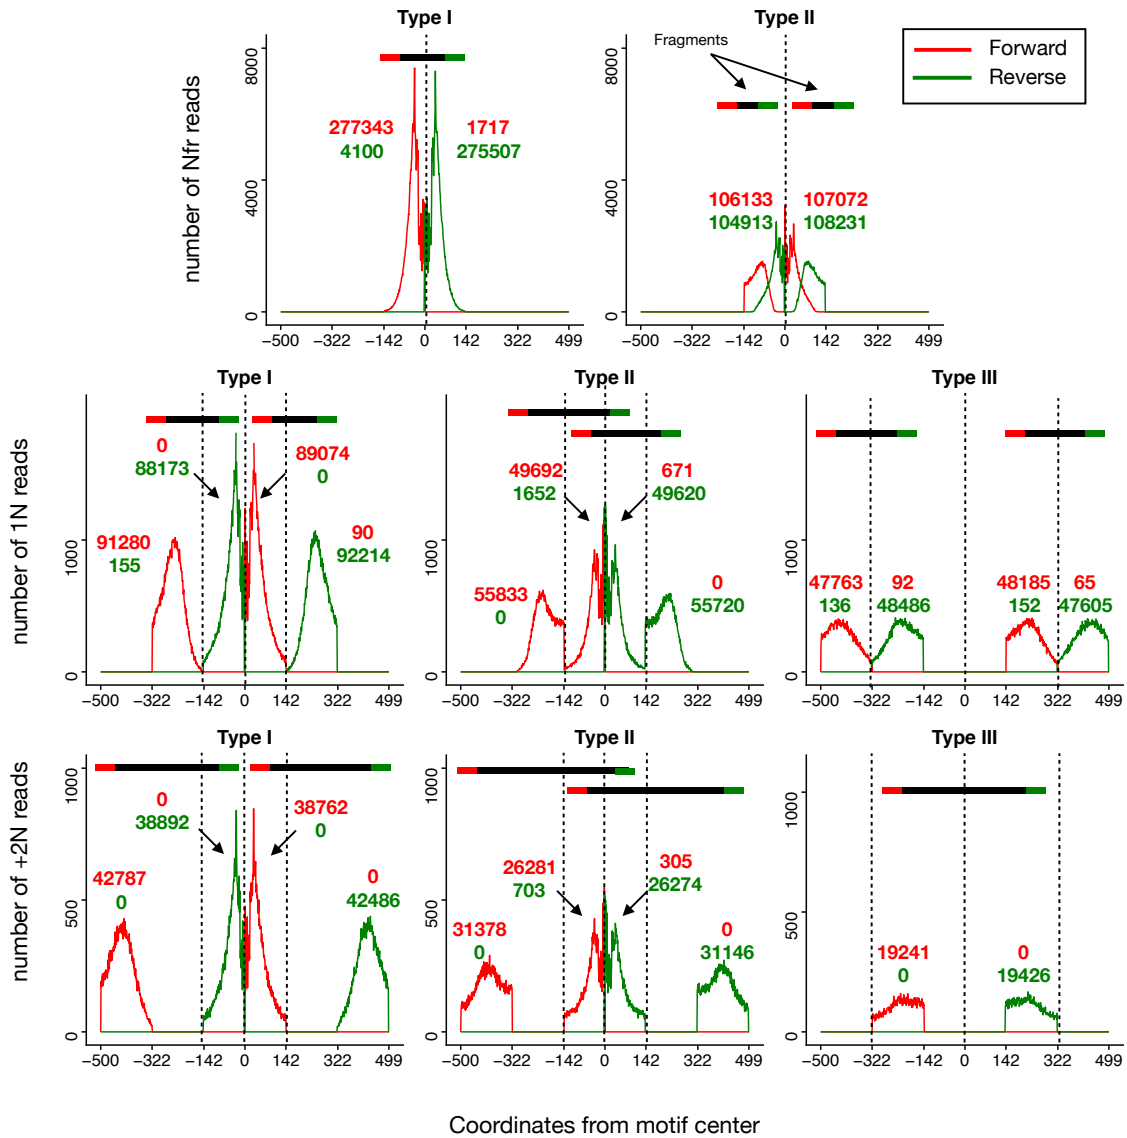

Figure S17: Number of reads (without bias correction) of standard ATAC-seq for each type of reads defined in Fig. 3A around CTCF ChIP-seq peaks on GM12878 cells. As for Omni-ATAC-seq, we observe more type I than type II reads for Nfr (281k vs 210k), 1N (178k vs 105k) and +2N reads (81k vs. 57k). These supports the strand bias observed in nucleosome size decomposed ATAC-seq profiles.

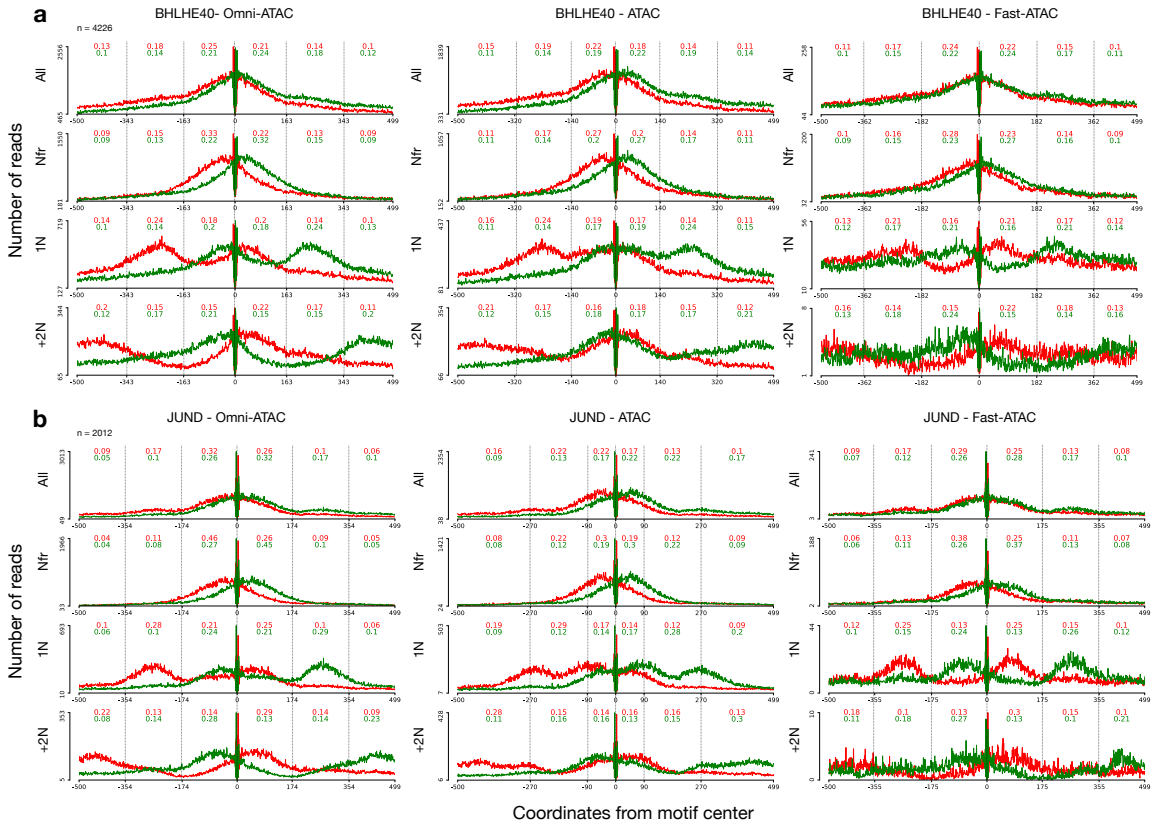

Figure S18: Average bias corrected cleavage signals of GM12878 cells from Omni, standard and Fast ATAC-seq protocols for factors BHLHE40 and JUND using different nucleosome decompositions.

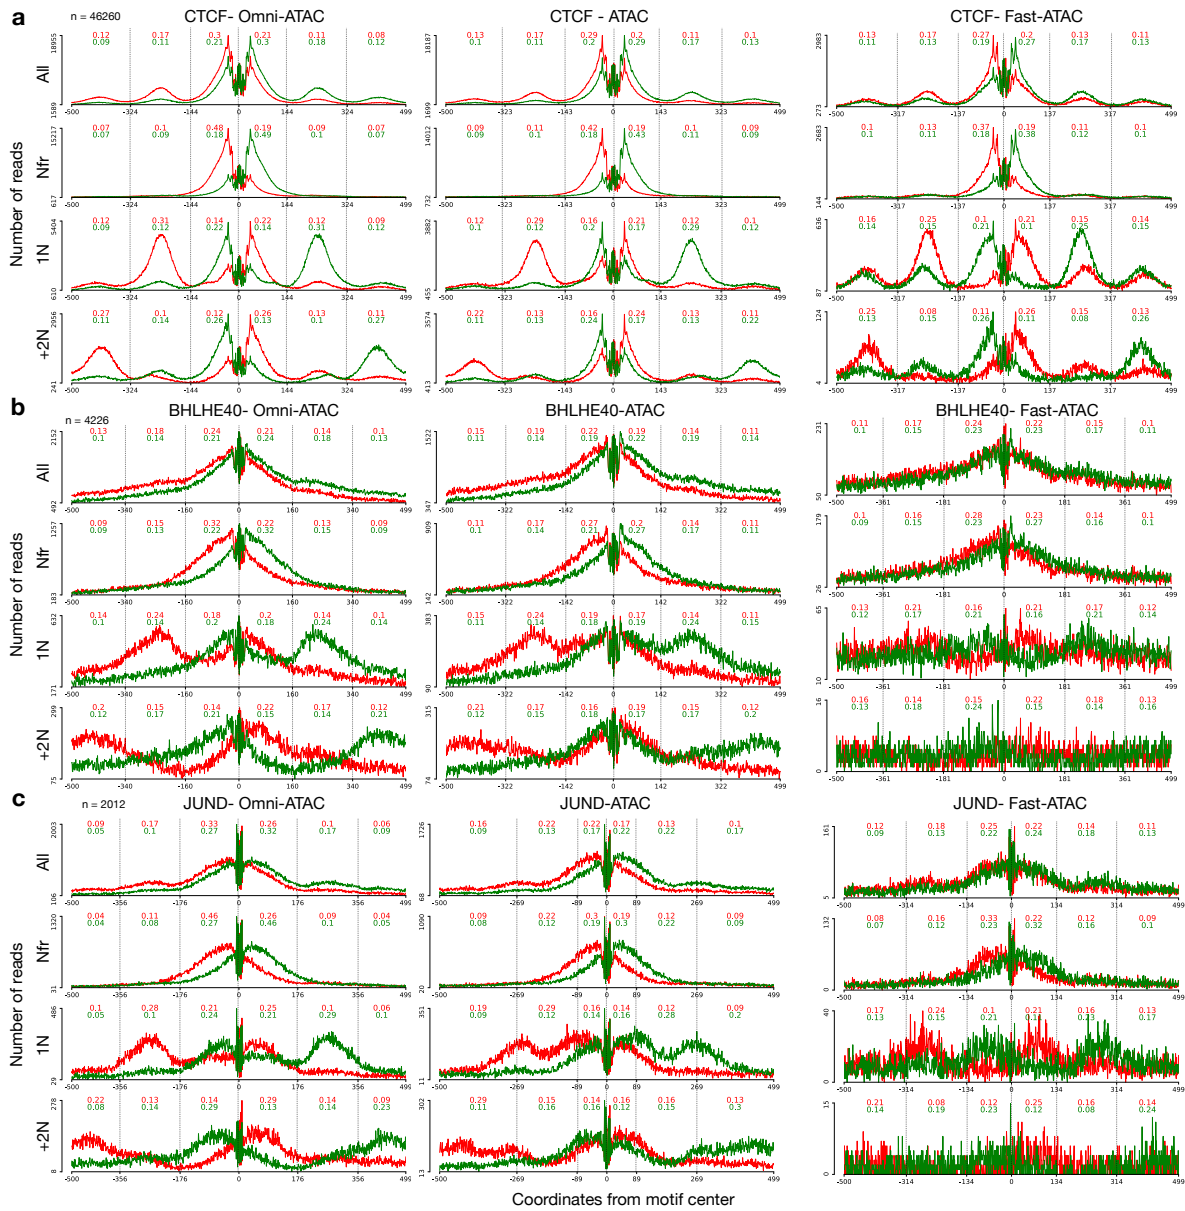

Figure S19: Average cleavage signals (without bias correction) of GM12878 cells from Omni, standard and Fast ATAC-seq protocols for factors CTCF, BHLHE40 and JUND using using different nucleosome decompositions.

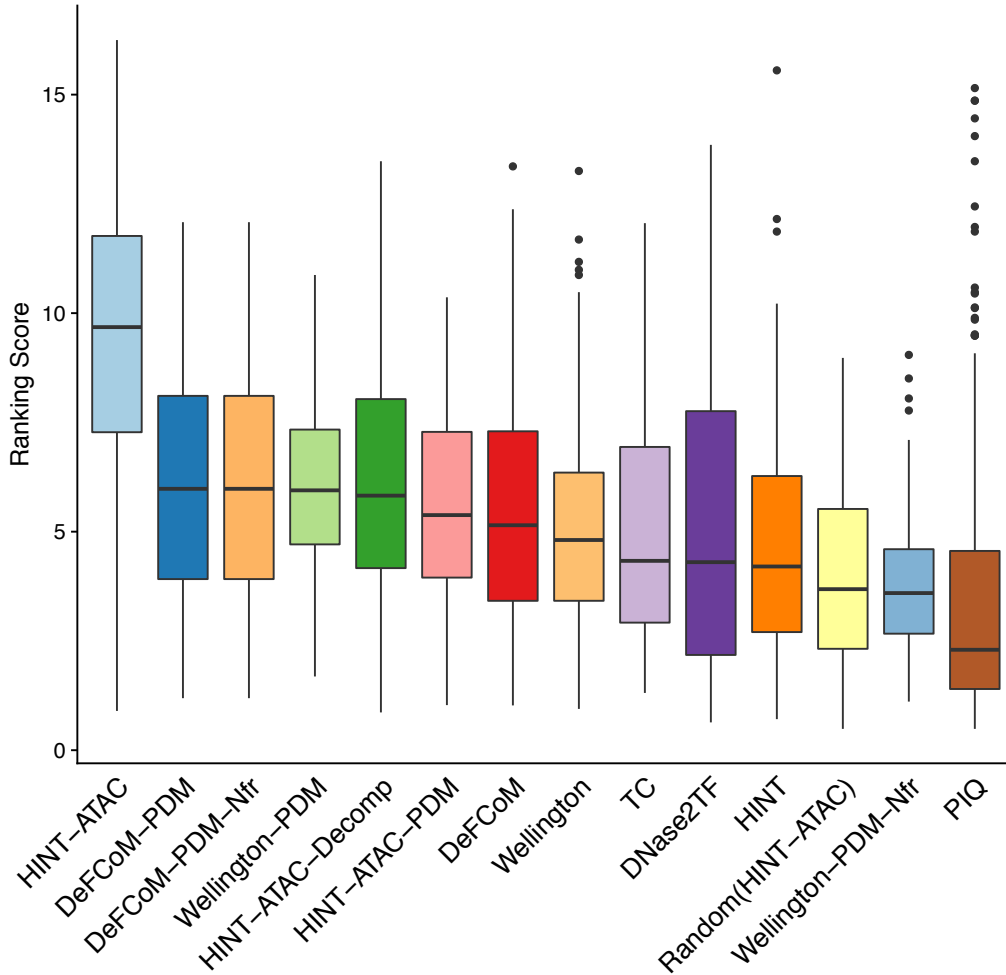

Figure S20: Extension of the comparative analysis (Fig. 5a - main manuscript) of distinct footprinting methods for Omni ATAC-seq on K562 cells and standard ATAC-seq on K562 and H1-ESC cells (see Table S21-S22 for statistics results). This comparison includes HINT-ATAC with both PDM bias correction and nucleosome decompositions (HINT-ATAC), HINT-ATAC with PDM bias correction and all reads (HINT-ATAC-PDM) and HINT-ATAC with nucleosome decomposition and no bias correction (HINT-ATAC-Decomp). While HINT-ATAC-PDM and HINT-ATAC-Decomp improve their performance in comparison to HINT, their combination (HINT-ATAC) results in the best ranked method. Competing methods Wellington and DeFCoM are also tested with both bias correction and the use of nucleosome free reads (Wellington-PDM-Nfr and DeFCoM-PDM-Nfr). While both methods profit from PDM bias correction, there is no improvement on the use of Nfr reads. We also include a control based on the execution of HINT-ATAC on K562 and H1-ESC libraries, where read locations were randomly shifted between 0 and 15 bps from its alignment position [Random(HINT-ATAC)]. As expected, most methods (with the exception of PIQ) have higher rankings than this baseline approach.

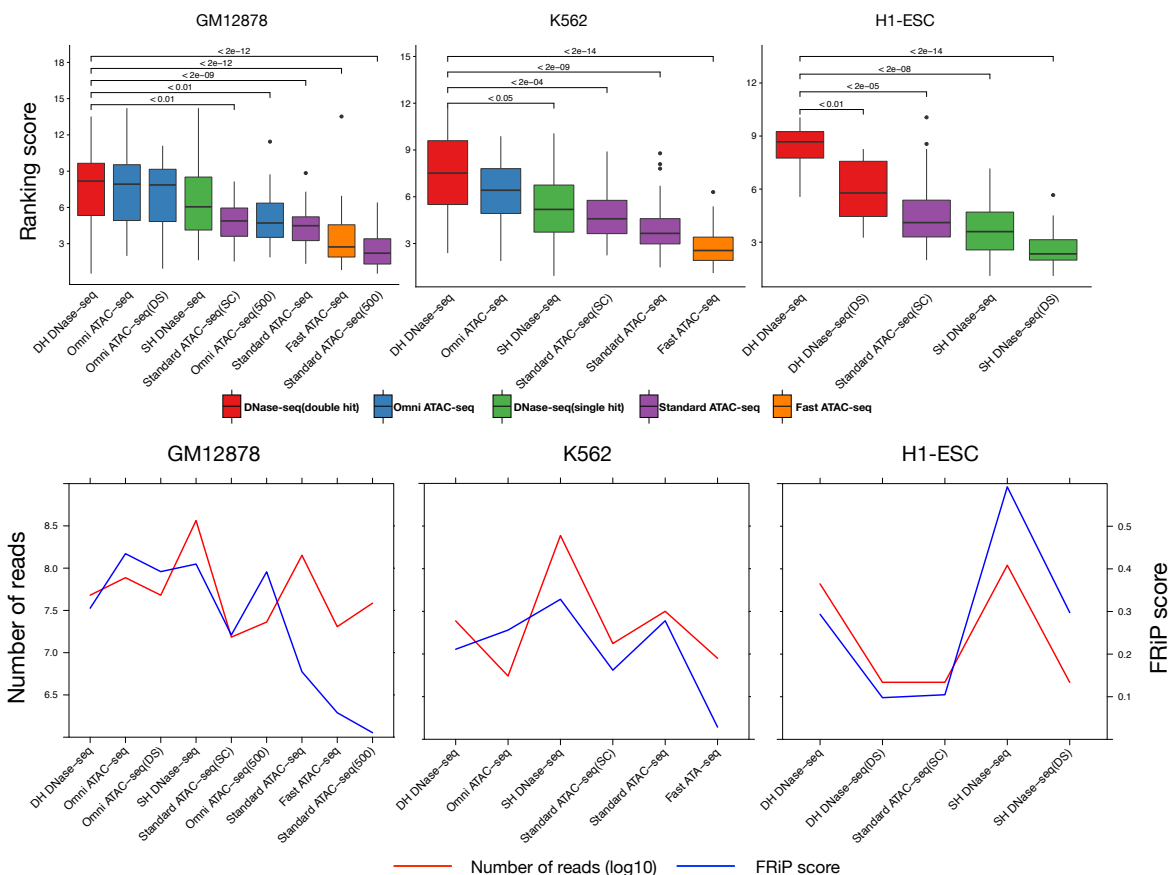

Figure S21: Comparison between different ATAC-seq and DNase-seq protocols in terms of footprint prediction for GM12878 (left), K562 (middle) and H1-ESC (right). DNase-seq data of GM12878, K562 and H1-ESC are based on either double hit (“DH”) or single hit (“SH”) protocols. ATAC-seq data was based on Omni, Fast and standard protocols. For each protocol, we used the best HMM and nucleosome decomposition strategy as trained/evaluated in GM12878 cells. Some of the standard ATAC-seq libraries were based on distinct number of cells (50.000 or 500) or performed on a single cell (SC) level. We have down-sampled Omni-ATAC [Omni-ATAC(DS)] to have a similar number of reads than DNase-SH for GM12878 and we have down-sampled DNase-DH [DNase-DH(DS)] to have the same number of reads as ATAC-seq in H1-ESC. While downsampling reduced scores, it did not affect the overall ranking of protocols. We observed that Omni ATAC-seq significantly outperformed the other protocols for GM12878 ( $p$ -value  $< 0.01$ ) and K562 ( $p$ -value  $< 0.05$ ), with exception of downsampled Omni and single hit DNase-seq. For H1-ESC, downsampled DNase-seq (double hit) had the second highest ranking score and significantly outperformed the original and downsampled single hit DNase-seq ( $p$ -value  $< 0.05$ ). See Table S25-S30 for statistics test results).



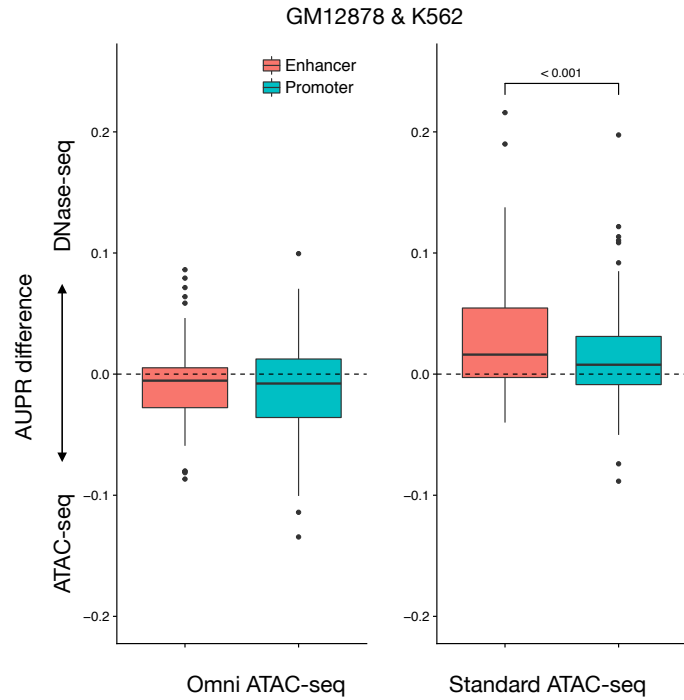

Figure S22: Difference in AUPR of double hit DNase-seq vs. Omni ATAC-seq (left) and double hit DNase-seq vs. standard ATAC-seq (right) on either enhancer and promoter regions. We observe positive values (higher AUPR for DNase-seq than standard ATAC-seq) in enhancer regions, but no significant differences are found on comparing Omni-ATAC and DNase-seq (Wilcoxon signed rank test).

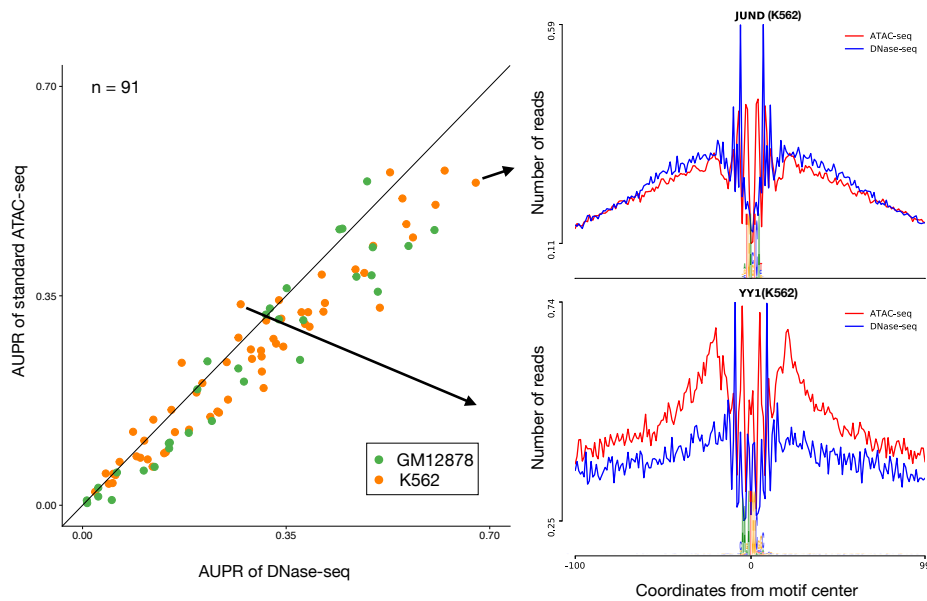

Figure S23: AUPR values of DNase-seq (double hit) and standard ATAC-seq for 91 factors in K562 and GM12878 cells. We highlight the footprint profiles of two factors (YY1 and JUND) with high differences in AUPR as in Fig. 5b of the main text.

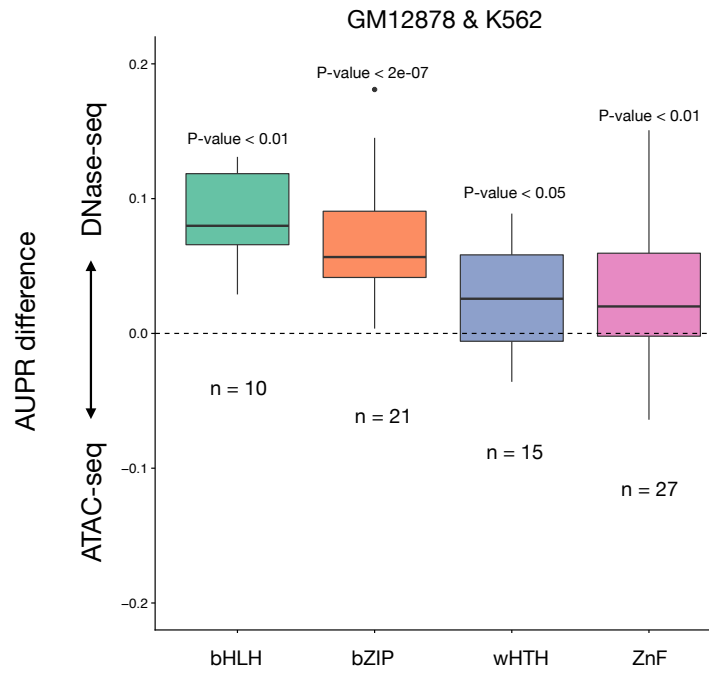

Figure S24: AUPR differences (DNase-ATAC) of double hit DNase-seq vs standard ATAC-seq based on different transcription factor families.  $p$ -value are obtained by a  $t$ -test (mean different from zero).

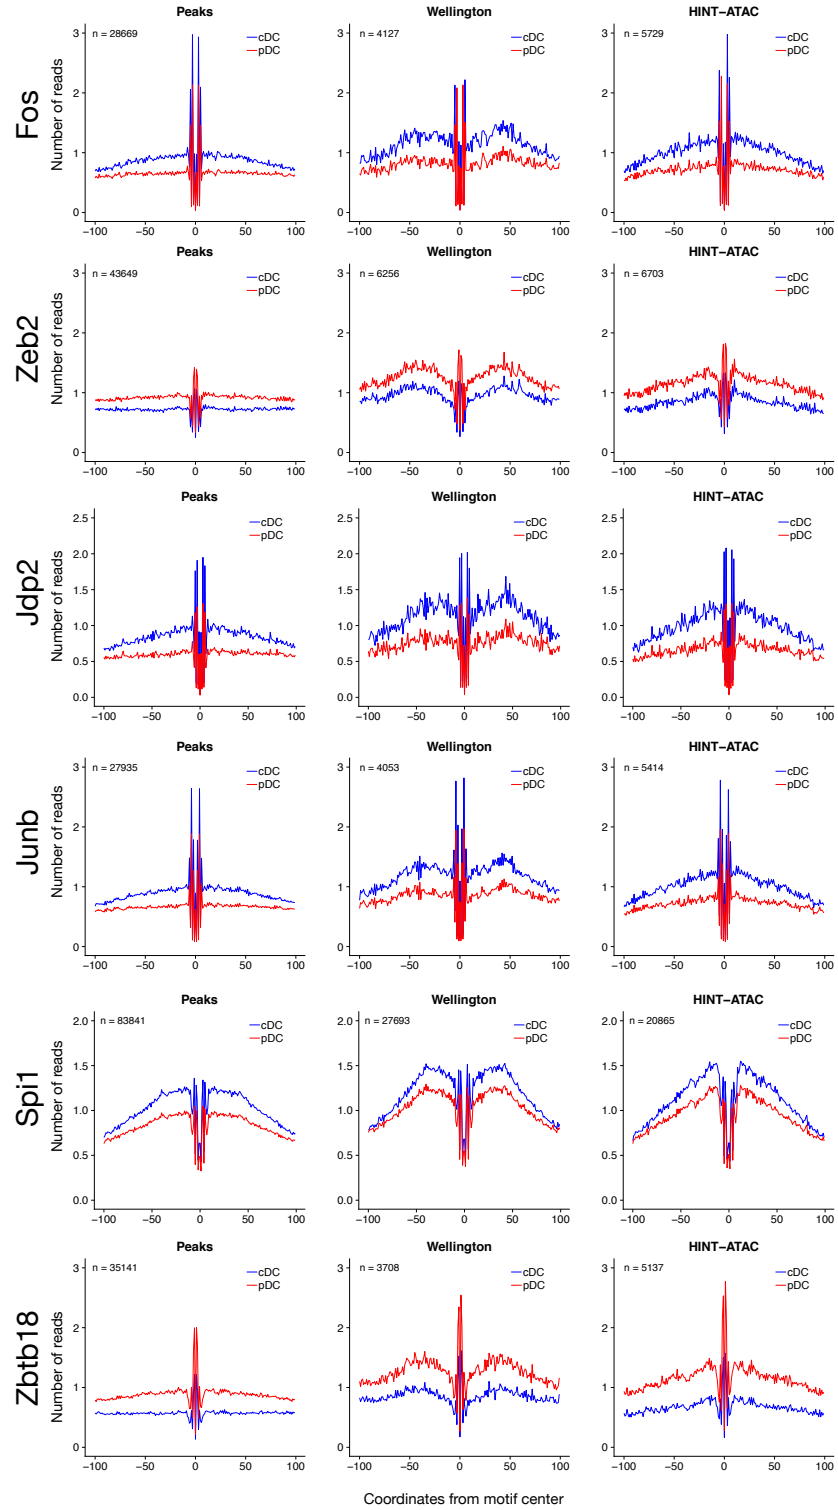

Figure S25: Average bias corrected cleavage profiles of motif predicted binding sites for Fos, Zeb2, Jdp2, Junb, Spi1 and Zbtb18 inside ATAC-seq peaks, or supported by footprints of Wellington and HINT-ATAC.

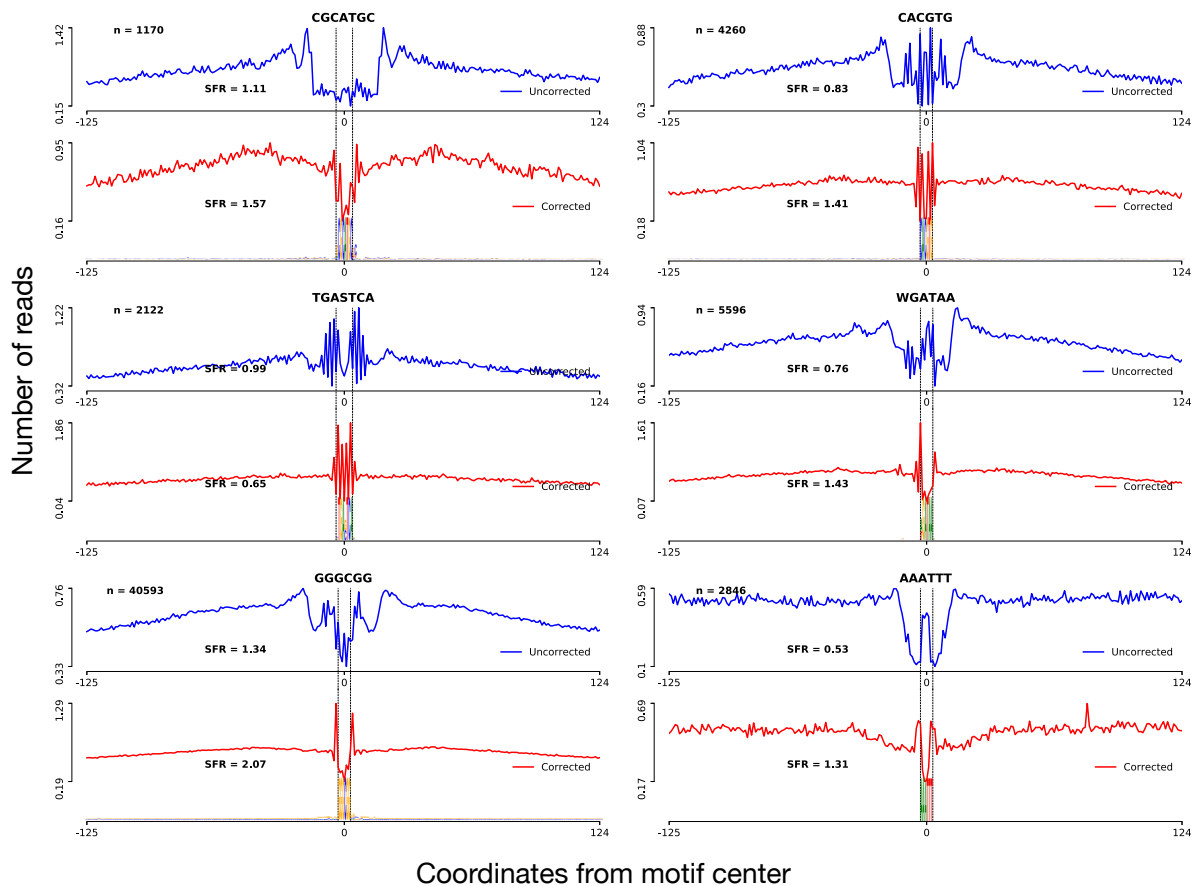

Figure S26: PDM-based bias corrected (red) and uncorrected (blue) on ATAC-seq of primary erythroid samples (Schwessinger et al. 2017). We show here the same k-mers as in supplemental figure S7 of (Schwessinger et al. 2017), which all have clear footprint profiles for DNase-seq, but not for ATAC-seq. We observe that for 5 out of the 6 motifs, PDM-based bias correction leaves clear footprints encompassing only the conserved DNA sequences of the motifs. To make this point more quantitative, we calculated the shoulder-footprint-ratio (SFR) proposed in Schwessinger et al. (2017), where values higher than 1 indicate the presence of a footprint. We observe higher SFR values for all motifs with the exception of TGASTCA.

Table S1: Average ranking score of bias estimation methods for standard ATAC-seq in GM12787 cells.

| Average ranking score |          |
|-----------------------|----------|
| PDM(8)                | 7.135296 |
| KMER(12)              | 6.759167 |
| PDM(8)-Naked          | 6.088727 |
| KMER(12)-Naked        | 5.444305 |
| PWM(8)                | 4.399636 |
| Uncorrected           | 3.199035 |
| PWM(8)-Naked          | 3.052238 |

Table S2: Friedman-Nemenyi test results of the **Ranking Score** metric of bias estimation methods for standard ATAC-seq in GM12787 cells. The asterisk and the two asterisks, respectively, mean that the method in the column outperformed the method in the row with significance levels of 0.05 and 0.01

|                | PDM(8) | KMER(12) | PDM(8)-Naked | KMER(12)-Naked | PWM(8) | Uncorrected | PWM(8)-Naked |
|----------------|--------|----------|--------------|----------------|--------|-------------|--------------|
| PDM(8)         |        |          |              |                |        |             |              |
| KMER(12)       |        |          |              |                |        |             |              |
| PDM(8)-Naked   |        |          |              |                |        |             |              |
| KMER(12)-Naked | *      |          |              |                |        |             |              |
| PWM(8)         | **     | **       | *            |                |        |             |              |
| Uncorrected    | **     | **       | **           | **             |        |             |              |
| PWM(8)-Naked   | **     | **       | **           | **             |        |             |              |

Table S3: Average ranking score of bias estimation methods for DNase-seq in GM12878 cells.

| Average ranking score |          |
|-----------------------|----------|
| PDM(8)                | 6.461679 |
| PDM(8)-Naked          | 5.943931 |
| PWM(4)                | 5.762482 |
| PWM(4)-Naked          | 5.673683 |
| KMER(4)               | 5.529089 |
| KMER(4)-Naked         | 4.602449 |
| Uncorrected           | 2.084486 |

Table S4: Friedman-Nemenyi test results of the **Ranking Score** metric for bias estimation methods for DNase-seq in GM12878 cells. The asterisk and the two asterisks, respectively, mean that the method in the column outperformed the method in the row with significance levels of 0.05 and 0.01

|               | PDM(8) | PDM(8)-Naked | PWM(4) | PWM(4)-Naked | KMER(4) | KMER(4)-Naked | Uncorrected |
|---------------|--------|--------------|--------|--------------|---------|---------------|-------------|
| PDM(8)        |        |              |        |              |         |               |             |
| PDM(8)-Naked  |        |              |        |              |         |               |             |
| PWM(4)        |        |              |        |              |         |               |             |
| PWM(4)-Naked  |        |              |        |              |         |               |             |
| KMER(4)       |        |              |        |              |         |               |             |
| KMER(4)-Naked |        |              |        |              |         |               |             |
| Uncorrected   | **     | **           | **     | **           | **      | **            | **          |

Table S5: Average ranking score of bias estimation methods for Omni ATAC-seq in GM12878 cells.

| <b>Average ranking score</b> |          |
|------------------------------|----------|
| KMER(12)                     | 7.149596 |
| PDM(8)                       | 6.338731 |
| PWM(4)                       | 2.968498 |
| Uncorrected                  | 3.055695 |

Table S6: Friedman-Nemenyi test results of the **Ranking Score** metric for bias estimation methods for Omni ATAC-seq in GM12878 cells. The asterisk and the two asterisks, respectively, mean that the method in the column outperformed the method in the row with significance levels of 0.05 and 0.01

|             | KMER(12) | PDM(8) | PWM(4) | Uncorrected |
|-------------|----------|--------|--------|-------------|
| KMER(12)    |          |        |        |             |
| PDM(8)      |          |        |        |             |
| PWM(4)      | **       | **     |        |             |
| Uncorrected | **       | **     |        |             |

Table S7: Average ranking score of bias estimation methods for Fast ATAC-seq in GM12878 cells.

| <b>Average ranking score</b> |          |
|------------------------------|----------|
| PDM(8)                       | 5.901833 |
| KMER(10)                     | 4.796283 |
| PWM(2)                       | 5.201683 |
| Uncorrected                  | 3.612721 |

Table S8: Friedman-Nemenyi test results of the **Ranking Score** metric for bias estimation methods for Fast ATAC-seq in GM12878 cells. The asterisk and the two asterisks, respectively, mean that the method in the column outperformed the method in the row with significance levels of 0.05 and 0.01

|             | PDM(8) | KMER(10) | PWM(2) | Uncorrected |
|-------------|--------|----------|--------|-------------|
| PDM(8)      |        |          |        |             |
| KMER(10)    |        |          |        |             |
| PWM(2)      |        |          |        |             |
| Uncorrected | **     |          |        |             |

Table S9: Average ranking score of bias estimation methods for downsampled Omni ATAC-seq (75%) in GM12878 cells.

| Average ranking score |          |
|-----------------------|----------|
| PDM(8)                | 8.286579 |
| KMER(10)              | 5.075464 |
| PWM(4)                | 3.383311 |
| Uncorrected           | 2.767166 |

Table S10: Friedman-Nemenyi test results of the **Ranking Score** metric for bias estimation methods for downsampled Omni ATAC-seq (75%) in GM12878 cells. The asterisk and the two asterisks, respectively, mean that the method in the column outperformed the method in the row with significance levels of 0.05 and 0.01

|             | PDM(8) | KMER(10) | PWM(4) | Uncorrected |
|-------------|--------|----------|--------|-------------|
| PDM(8)      |        |          |        |             |
| KMER(10)    | *      |          |        |             |
| PWM(4)      | **     |          |        |             |
| Uncorrected | **     | **       |        |             |



Table S11: Average ranking score of bias estimation methods for downsampled Omni ATAC-seq (50%) in GM12878 cells.

| <b>Average ranking score</b> |          |
|------------------------------|----------|
| PDM(8)                       | 8.283322 |
| KMER(10)                     | 4.947127 |
| PWM(2)                       | 3.451975 |
| Uncorrected                  | 2.826416 |

Table S12: Friedman-Nemenyi test results of the **Ranking Score** metric for for downsampled Omni ATAC-seq (50%) in GM12878 cells. The asterisk and the two asterisks, respectively, mean that the method in the column outperformed the method in the row with significance levels of 0.05 and 0.01

|             | PDM(8) | KMER(10) | PWM(2) | Uncorrected |
|-------------|--------|----------|--------|-------------|
| PDM(8)      |        |          |        |             |
| KMER(10)    | **     |          |        |             |
| PWM(2)      | **     | *        |        |             |
| Uncorrected | **     | **       |        |             |

Table S13: Average ranking score of the best models of Omni ATAC-seq in GM12878 cells

| Average ranking score |          |
|-----------------------|----------|
| Nfr & +1N             | 7.156957 |
| Nfr                   | 7.081356 |
| All                   | 3.651808 |
| Nfr & 1N & +2N        | 1.622399 |

Table S14: Friedman-Nemenyi test results of the **Ranking Score** metric for the best models of Omni ATAC-seq in GM12878 cells. The asterisk and the two asterisks, respectively, mean that the method in the column outperformed the method in the row with significance levels of 0.05 and 0.01

|                | Nfr & +1N | Nfr | All | Nfr & 1N & +2N |
|----------------|-----------|-----|-----|----------------|
| Nfr & +1N      |           |     |     |                |
| Nfr            |           |     |     |                |
| All            | **        | **  |     |                |
| Nfr & 1N & +2N | **        | **  | **  |                |

Table S15: Average ranking score of the best models of standard ATAC-seq in GM12878 cells.

| Average ranking score |          |
|-----------------------|----------|
| Nfr                   | 6.930935 |
| Nfr & +1N             | 4.579251 |
| All                   | 4.113331 |
| Nfr & 1N & +2N        | 3.889003 |

Table S16: Friedman-Nemenyi test results of the **Ranking Score** metric the best models of standard ATAC-seq in GM12878 cells. The asterisk and the two asterisks, respectively, mean that the method in the column outperformed the method in the row with significance levels of 0.05 and 0.01

|                | Nfr | Nfr & +1N | All | Nfr & 1N & +2N |
|----------------|-----|-----------|-----|----------------|
| Nfr            |     |           |     |                |
| Nfr & +1N      | **  |           |     |                |
| All            | **  |           |     |                |
| Nfr & 1N & +2N | **  |           |     |                |

Table S17: Average ranking score of methods for double hit DNase-seq in GM12878 cells

| Average Ranking Score |          |
|-----------------------|----------|
| Stranded-9 states     | 8.672999 |
| Stranded-3 states     | 8.073677 |
| Unstranded-3 states   | 6.634533 |
| Unstranded-9 states   | 5.442201 |
| Stranded-7 states     | 4.583651 |
| Stranded-5 states     | 3.924278 |
| Unstranded-7 states   | 2.845278 |
| Unstranded-5 states   | 1.528667 |

Table S18: Friedman-Nemenyi test results of the **Ranking Score** metric for double hit DNase-seq in GM12878 cells. The asterisk and the two asterisks, respectively, mean that the method in the column outperformed the method in the row with significance levels of 0.05 and 0.01

|                     | Stranded-9 states | Stranded-3 states | Unstranded-3 states | Unstranded-9 states | Stranded-7 states | Stranded-5 states | Unstranded-7 states | Unstranded-5 states |
|---------------------|-------------------|-------------------|---------------------|---------------------|-------------------|-------------------|---------------------|---------------------|
| Stranded-9 states   |                   |                   |                     |                     |                   |                   |                     |                     |
| Stranded-3 states   |                   |                   |                     |                     |                   |                   |                     |                     |
| Unstranded-3 states |                   |                   |                     |                     |                   |                   |                     |                     |
| Unstranded-9 states | *                 | *                 |                     |                     |                   |                   |                     |                     |
| Stranded-7 states   | **                | **                |                     |                     |                   |                   |                     |                     |
| Stranded-5 states   | **                | **                | **                  |                     |                   |                   |                     |                     |
| Unstranded-7 states | **                | **                | **                  | **                  |                   |                   |                     |                     |
| Unstranded-5 states | **                | **                | **                  | **                  | **                | **                |                     |                     |

Table S19: Average ranking score of methods for single hit DNase-seq in GM12878 cells

| Average Ranking Score |          |
|-----------------------|----------|
| Stranded-7 states     | 8.872965 |
| Stranded-3 states     | 7.750739 |
| Stranded-5 states     | 5.369318 |
| Unstranded-9 states   | 4.662625 |
| Stranded-9 states     | 4.553709 |
| Unstranded-3 states   | 4.576396 |
| Unstranded-5 states   | 2.825925 |
| Unstranded-7 states   | 3.090412 |

Table S20: Friedman-Nemenyi test results of the **Ranking Score** metric for single hit DNase-seq in GM12878 cells. The asterisk and the two asterisks, respectively, mean that the method in the column outperformed the method in the row with significance levels of 0.05 and 0.01

|                     | Stranded-7 states | Stranded-3 states | Stranded-5 states | Unstranded-9 states | Stranded-9 states | Unstranded-3 states | Unstranded-5 states | Unstranded-7 states |
|---------------------|-------------------|-------------------|-------------------|---------------------|-------------------|---------------------|---------------------|---------------------|
| Stranded-7 states   |                   |                   |                   |                     |                   |                     |                     |                     |
| Stranded-3 states   |                   |                   |                   |                     |                   |                     |                     |                     |
| Stranded-5 states   | **                |                   |                   |                     |                   |                     |                     |                     |
| Unstranded-9 states | **                | **                |                   |                     |                   |                     |                     |                     |
| Stranded-9 states   | **                | **                |                   |                     |                   |                     |                     |                     |
| Unstranded-3 states | **                | **                |                   |                     |                   |                     |                     |                     |
| Unstranded-5 states | **                | **                | **                | *                   |                   |                     |                     |                     |
| Unstranded-7 states | **                | **                | **                | *                   |                   |                     |                     |                     |

Table S21: Average ranking score of comparative evaluation of competing methods using the **Test dataset** (K562 and H1-ESC cells).

| Average ranking score |          |
|-----------------------|----------|
| HINT-ATAC             | 9.399456 |
| DeFCoM-PDM            | 5.968795 |
| DeFCoM-PDM-Nfr        | 5.968795 |
| Wellington-PDM        | 6.066458 |
| HINT-ATAC-Decomp      | 6.075212 |
| HINT-ATAC-PDM         | 5.517628 |
| DeFCoM                | 5.525881 |
| Wellington            | 5.176601 |
| TC                    | 5.180950 |
| DNase2TF              | 5.070137 |
| HINT                  | 4.667121 |
| Random(HINT-ATAC)     | 3.860066 |
| Wellington-PDM-Nfr    | 3.829496 |
| PIQ                   | 3.866870 |

Table S22: Friedman-Nemenyi test results of the **Ranking Score** metric for comparative evaluation of competing methods using the **Test dataset** (K562 and H1-ESC cells). The asterisk and the two asterisks, respectively, mean that the method in the column outperformed the method in the row with significance levels of 0.05 and 0.01

|                    | HINT-ATAC | DeFCoM-PDM | DeFCoM-PDM-Nfr | Wellington-PDM | HINT-ATAC-Decomp | HINT-ATAC-PDM | DeFCoM | Wellington | TC | DNase2TF | HINTBC | Random(HINT-ATAC) | Wellington-PDM-Nfr | PIQ |
|--------------------|-----------|------------|----------------|----------------|------------------|---------------|--------|------------|----|----------|--------|-------------------|--------------------|-----|
| HINT-ATAC          |           |            |                |                |                  |               |        |            |    |          |        |                   |                    |     |
| DeFCoM-PDM         | **        |            |                |                |                  |               |        |            |    |          |        |                   |                    |     |
| DeFCoM-PDM-Nfr     | **        |            |                |                |                  |               |        |            |    |          |        |                   |                    |     |
| Wellington-PDM     | **        |            |                |                |                  |               |        |            |    |          |        |                   |                    |     |
| HINT-ATAC-Decomp   | **        |            |                |                |                  |               |        |            |    |          |        |                   |                    |     |
| HINT-ATAC-PDM      | **        |            |                |                |                  |               |        |            |    |          |        |                   |                    |     |
| DeFCoM             | **        |            |                |                |                  |               |        |            |    |          |        |                   |                    |     |
| Wellington         | **        |            |                |                |                  |               |        |            |    |          |        |                   |                    |     |
| TC                 | **        |            |                |                |                  |               |        |            |    |          |        |                   |                    |     |
| DNase2TF           | **        |            |                | *              |                  |               |        |            |    |          |        |                   |                    |     |
| HINTBC             | **        | *          | *              | *              | *                |               |        |            |    |          |        |                   |                    |     |
| Random(HINT-ATAC)  | **        | **         | **             | **             | **               | **            | **     | *          | *  |          |        |                   |                    |     |
| Wellington-PDM-Nfr | **        | **         | **             | **             | **               | **            | **     | **         | ** | *        |        |                   |                    |     |
| PIQ                | **        | **         | **             | **             | **               | **            | **     | **         | ** | **       | *      |                   |                    |     |

Table S23: Average ranking score of comparative evaluation of competing methods using the **Test dataset** (K562 and H1-ESC cells).

| Average ranking score |          |
|-----------------------|----------|
| HINT-ATAC             | 8.378000 |
| Wellington-PDM        | 5.866785 |
| DeFCoM-PDM            | 5.731028 |
| DeFCoM                | 5.107398 |
| Wellington            | 4.970716 |
| TC                    | 4.765912 |
| DNase2TF              | 4.654832 |
| HINTBC                | 4.447350 |
| PIQ                   | 3.583616 |

Table S24: Friedman-Nemenyi test results of the **Ranking Score** metric for comparative evaluation of competing methods using the **Test dataset** (K562 and H1-ESC cells). The asterisk and the two asterisks, respectively, mean that the method in the column outperformed the method in the row with significance levels of 0.05 and 0.01

|                | HINT-ATAC | Wellington-PDM | DeFCoM-PDM | DeFCoM | Wellington | TC | DNase2TF | HINTBC | PIQ |
|----------------|-----------|----------------|------------|--------|------------|----|----------|--------|-----|
| HINT-ATAC      |           |                |            |        |            |    |          |        |     |
| DeFCoM-PDM     | **        |                |            |        |            |    |          |        |     |
| Wellington-PDM | **        |                |            |        |            |    |          |        |     |
| DeFCoM         | **        |                |            |        |            |    |          |        |     |
| Wellington     | **        |                |            |        |            |    |          |        |     |
| TC             | **        | *              |            |        |            |    |          |        |     |
| DNase2TF       | **        | *              | *          |        |            |    |          |        |     |
| HINTBC         | **        | **             | **         |        |            |    |          |        |     |
| PIQ            | **        | **             | **         | **     | **         | ** | **       | **     | **  |

Table S25: Average ranking score of different protocols for GM12878 cells.

| Average Ranking Score  |          |
|------------------------|----------|
| DU DNase-seq           | 7.808499 |
| Omni ATAC-seq          | 7.654787 |
| Omni ATAC-seq(DS)      | 7.115633 |
| SH DNase-seq           | 6.682315 |
| Standard ATAC-seq      | 4.508517 |
| Omni ATAC-seq(500)     | 4.461801 |
| Standard ATAC-seq      | 4.088874 |
| Fast ATAC-seq          | 2.936969 |
| Standard ATAC-seq(500) | 2.118225 |

Table S26: Friedman-Nemenyi test results of the **Ranking Score** metric for GM12878 cells.. The asterisk and the two asterisks, respectively, mean that the method in the column outperformed the method in the row with significance levels of 0.05 and 0.01

|                        | DH DNase-seq | Omni ATAC-seq | Omni ATAC-seq(DS) | SH DNase-seq | Standard ATAC-seq(SC) | Omni ATAC-seq(500) | Standard ATAC-seq | Fast ATAC-seq | Standard ATAC-seq(500) |
|------------------------|--------------|---------------|-------------------|--------------|-----------------------|--------------------|-------------------|---------------|------------------------|
| DH DNase-seq           |              |               |                   |              |                       |                    |                   |               |                        |
| Omni ATAC-seq          |              |               |                   |              |                       |                    |                   |               |                        |
| Omni ATAC-seq(DS)      |              |               |                   |              |                       |                    |                   |               |                        |
| SH DNase-seq           |              |               |                   |              |                       |                    |                   |               |                        |
| Standard ATAC-seq(SC)  | **           | **            | *                 |              |                       |                    |                   |               |                        |
| Omni ATAC-seq(500)     | **           | **            | *                 |              |                       |                    |                   |               |                        |
| Standard ATAC-seq      | **           | **            | **                | *            |                       |                    |                   |               |                        |
| Fast ATAC-seq          | **           | **            | **                | **           |                       |                    |                   |               |                        |
| Standard ATAC-seq(500) | **           | **            | **                | **           | **                    | **                 | *                 |               |                        |



Table S27: Average ranking score of different protocols for K562 cells.

| Average Ranking Score |          |
|-----------------------|----------|
| DH DNase-seq          | 7.451539 |
| Omni ATAC-seq         | 6.32159  |
| SH DNase-seq          | 5.290864 |
| Standard ATAC-seq(SC) | 4.775758 |
| Standard ATAC-seq     | 3.914304 |
| Fast ATAC-seq         | 2.823203 |

Table S28: Friedman-Nemenyi test results of the **Ranking Score** metric for K562 cells. The asterisk and the two asterisks, respectively, mean that the method in the column outperformed the method in the row with significance levels of 0.05 and 0.01

|                       | DH DNase-seq | Omni ATAC-seq | SH DNase-seq | Standard ATAC-seq(SC) | Standard ATAC-seq | Fast ATAC-seq |
|-----------------------|--------------|---------------|--------------|-----------------------|-------------------|---------------|
| DH DNase-seq          |              |               |              |                       |                   |               |
| Omni ATAC-seq         |              |               |              |                       |                   |               |
| SH DNase-seq          | *            |               |              |                       |                   |               |
| Standard ATAC-seq(SC) | **           | *             |              |                       |                   |               |
| Standard ATAC-seq     | **           | **            | *            |                       |                   |               |
| Fast ATAC-seq         | **           | **            | **           | **                    | *                 |               |

Table S29: Average ranking score of different protocols for H1-ESC cells.

| Average Ranking Score |          |
|-----------------------|----------|
| DH DNase-seq          | 8.400458 |
| DH DNase-seq(DS)      | 5.803238 |
| Standard ATAC-seq(SC) | 4.563197 |
| SH DNase-seq          | 3.657482 |
| SH DNase-seq(DS)      | 2.557938 |

Table S30: Friedman-Nemenyi test results of the **Ranking Score** metric for H1-ESC cells. The asterisk and the two asterisks, respectively, mean that the method in the column outperformed the method in the row with significance levels of 0.05 and 0.01

|                       | DH DNase-seq | DH DNase-seq(DS) | Standard ATAC-seq(SC) | SH DNase-seq | SH DNase-seq(DS) |
|-----------------------|--------------|------------------|-----------------------|--------------|------------------|
| DH DNase-seq          |              |                  |                       |              |                  |
| DH DNase-seq(DS)      | **           |                  |                       |              |                  |
| Standard ATAC-seq(SC) | **           |                  |                       |              |                  |
| SH DNase-seq          | **           | *                |                       |              |                  |
| SH DNase-seq(DS)      | **           | **               | **                    |              |                  |

Table S31: **Position frequency matrices (PFMs) and transcription factors (TFs) ChIP-seq used in the ChIP-seq evaluation methodology.** ChIP-seq was obtained from multiple labs within the Encode Consortium (2012). PFMs were obtained from Jaspar (Mathelier et al. 2014), Uniprobe (Robasky and Bulyk 2011) and Transfac (Matys et al. 2006).

| Cell | Factor  | PFM Repository | PFM ID   | ChIP-seq ID      | # Motifs | # Peaks | # Motifs with Peaks |
|------|---------|----------------|----------|------------------|----------|---------|---------------------|
| K562 | ARID3A  | Jaspar         | MA0151.1 | wgEncodeEH002861 | 2112327  | 9026    | 650                 |
| K562 | ATF1    | Uniprobe       | UP00020  | wgEncodeEH002865 | 246442   | 14864   | 5167                |
| K562 | ATF3    | Jaspar         | MA0018.2 | wgEncodeEH000700 | 496476   | 1233    | 277                 |
| K562 | BACH1   | Transfac       | M00495   | wgEncodeEH002846 | 614421   | 3806    | 2322                |
| K562 | BHLHE40 | Jaspar         | MA0464.1 | wgEncodeEH001857 | 572185   | 22497   | 7994                |
| K562 | CCNT2   | Jaspar         | MA0140.2 | wgEncodeEH001864 | 708983   | 20057   | 2537                |
| K562 | CEBPB   | Jaspar         | MA0466.1 | wgEncodeEH001821 | 1342548  | 38715   | 26843               |
| K562 | CTCF    | Jaspar         | MA0139.1 | wgEncodeEH002797 | 565933   | 54387   | 45170               |
| K562 | CTCFL   | Jaspar         | MA0139.1 | wgEncodeEH001652 | 565933   | 11533   | 10157               |
| K562 | E2F4    | Jaspar         | MA0470.1 | wgEncodeEH000671 | 173646   | 8181    | 3351                |
| K562 | E2F6    | Jaspar         | MA0471.1 | wgEncodeEH000676 | 1051116  | 16312   | 5022                |
| K562 | EFOS    | Jaspar         | MA0476.1 | wgEncodeEH001207 | 762222   | 10256   | 16616               |
| K562 | EGATA   | Jaspar         | MA0036.2 | wgEncodeEH001208 | 1028569  | 11478   | 4341                |
| K562 | EGR1    | Jaspar         | MA0162.2 | wgEncodeEH001646 | 1060314  | 36997   | 39583               |
| K562 | EJUNB   | Jaspar         | MA0490.1 | wgEncodeEH001210 | 717235   | 12287   | 14611               |
| K562 | EJUND   | Jaspar         | MA0491.1 | wgEncodeEH001211 | 717223   | 26674   | 21453               |
| K562 | ELF1    | Jaspar         | MA0473.1 | wgEncodeEH001619 | 1026618  | 27780   | 16016               |
| K562 | ELK1    | Jaspar         | MA0028.1 | wgEncodeEH003356 | 100691   | 2961    | 1592                |
| K562 | ETS1    | Jaspar         | MA0098.2 | wgEncodeEH001580 | 1319961  | 10726   | 1966                |
| K562 | FOS     | Jaspar         | MA0476.1 | wgEncodeEH000619 | 762222   | 7646    | 6847                |
| K562 | FOSL1   | Jaspar         | MA0477.1 | wgEncodeEH001637 | 699220   | 11174   | 16921               |
| K562 | GABP    | Jaspar         | MA0062.2 | wgEncodeEH001604 | 181503   | 14393   | 6687                |
| K562 | GATA1   | Jaspar         | MA0035.3 | wgEncodeEH000638 | 1040470  | 4074    | 2164                |
| K562 | GATA2   | Jaspar         | MA0036.2 | wgEncodeEH000683 | 1028569  | 10648   | 4681                |
| K562 | IRF1    | Jaspar         | MA0050.2 | wgEncodeEH002798 | 2330047  | 8352    | 5027                |
| K562 | JUN     | Jaspar         | MA0488.1 | wgEncodeEH000620 | 832374   | 9848    | 2939                |
| K562 | JUND    | Jaspar         | MA0491.1 | wgEncodeEH002164 | 717223   | 40052   | 29599               |
| K562 | MAFF    | Jaspar         | MA0495.1 | wgEncodeEH002804 | 1215808  | 25074   | 20563               |
| K562 | MAFK    | Jaspar         | MA0496.1 | wgEncodeEH001844 | 1221488  | 19317   | 14001               |
| K562 | MAX     | Jaspar         | MA0058.2 | wgEncodeEH002869 | 855374   | 31436   | 5239                |
| K562 | MEF2A   | Jaspar         | MA0052.2 | wgEncodeEH001663 | 3210613  | 5631    | 3068                |
| K562 | MYC     | Jaspar         | MA0147.2 | wgEncodeEH000621 | 614797   | 5023    | 1698                |
| K562 | NFE2    | Jaspar         | MA0501.1 | wgEncodeEH000624 | 796063   | 2637    | 2499                |
| K562 | NFYA    | Jaspar         | MA0060.2 | wgEncodeEH002021 | 428913   | 4286    | 4220                |
| K562 | NFYB    | Jaspar         | MA0502.1 | wgEncodeEH002024 | 470725   | 10096   | 12693               |
| K562 | NR2F2   | Uniprobe       | UP00009  | wgEncodeEH002382 | 626663   | 16678   | 3289                |
| K562 | NRF1    | Jaspar         | MA0506.1 | wgEncodeEH001796 | 137117   | 4211    | 6678                |
| K562 | PU1     | Jaspar         | MA0080.3 | wgEncodeEH001482 | 2040890  | 28677   | 29997               |
| K562 | RAD21   | Jaspar         | MA0139.1 | wgEncodeEH000649 | 565933   | 17627   | 17730               |
| K562 | REST    | Jaspar         | MA0138.2 | wgEncodeEH001638 | 629168   | 15849   | 4543                |
| K562 | RFX5    | Jaspar         | MA0510.1 | wgEncodeEH002033 | 629248   | 2201    | 519                 |
| K562 | SIX5    | Jaspar         | MA0088.1 | wgEncodeEH001483 | 1032447  | 4194    | 1792                |
| K562 | SMC3    | Jaspar         | MA0139.1 | wgEncodeEH001845 | 565933   | 23598   | 22980               |

| Cell    | Factor  | PFM Repository | PFM ID   | ChIP-seq ID      | # Motifs | # Peaks | # Motifs with Peaks |
|---------|---------|----------------|----------|------------------|----------|---------|---------------------|
| K562    | SP1     | Jaspar         | MA0079.3 | wgEncodeEH001578 | 1797400  | 7206    | 4932                |
| K562    | SP2     | Jaspar         | MA0516.1 | wgEncodeEH001653 | 1587339  | 3124    | 2572                |
| K562    | SRF     | Jaspar         | MA0083.2 | wgEncodeEH001600 | 1024023  | 4717    | 2617                |
| K562    | STAT1   | Jaspar         | MA0137.3 | wgEncodeEH000664 | 1272026  | 1476    | 295                 |
| K562    | STAT2   | Jaspar         | MA0517.1 | wgEncodeEH000666 | 3077582  | 1923    | 1629                |
| K562    | STAT5A  | Jaspar         | MA0519.1 | wgEncodeEH002347 | 1292097  | 9811    | 3776                |
| K562    | TAL1    | Jaspar         | MA0140.2 | wgEncodeEH001824 | 708983   | 26260   | 12380               |
| K562    | TBP     | Jaspar         | MA0108.1 | wgEncodeEH001825 | 834532   | 17558   | 480                 |
| K562    | THAP1   | Jaspar         | MA0597.1 | wgEncodeEH001655 | 561707   | 3506    | 349                 |
| K562    | TR4     | Jaspar         | MA0504.1 | wgEncodeEH000682 | 825980   | 587     | 262                 |
| K562    | USF1    | Jaspar         | MA0093.2 | wgEncodeEH001583 | 691899   | 18521   | 17111               |
| K562    | USF2    | Jaspar         | MA0526.1 | wgEncodeEH001797 | 759040   | 3083    | 3515                |
| K562    | YY1     | Jaspar         | MA0095.2 | wgEncodeEH000684 | 1325447  | 4948    | 3422                |
| K562    | ZBTB33  | Jaspar         | MA0527.1 | wgEncodeEH001569 | 82928    | 3285    | 2847                |
| K562    | ZBTB7A  | Uniprobe       | UP00047  | wgEncodeEH001620 | 412506   | 21711   | 948                 |
| K562    | ZNF143  | Jaspar         | MA0088.1 | wgEncodeEH002030 | 1032447  | 29069   | 4019                |
| K562    | ZNF263  | Jaspar         | MA0528.1 | wgEncodeEH000630 | 2577084  | 3081    | 6388                |
| GM12878 | ATF3    | Jaspar         | MA0018.2 | wgEncodeEH001562 | 496476   | 1677    | 272                 |
| GM12878 | BHLHE40 | Jaspar         | MA0464.1 | wgEncodeEH002025 | 572185   | 13986   | 4226                |
| GM12878 | CEBPB   | Jaspar         | MA0466.1 | wgEncodeEH003212 | 1342548  | 5786    | 493                 |
| GM12878 | CTCF    | Jaspar         | MA0139.1 | wgEncodeEH001851 | 565933   | 55551   | 46260               |
| GM12878 | E2F4    | Jaspar         | MA0470.1 | wgEncodeEH002867 | 173646   | 3440    | 1424                |
| GM12878 | EGR1    | Jaspar         | MA0162.2 | wgEncodeEH002328 | 1060314  | 16331   | 17629               |
| GM12878 | ELF1    | Jaspar         | MA0473.1 | wgEncodeEH001617 | 1026618  | 23008   | 9029                |
| GM12878 | ELK1    | Jaspar         | MA0028.1 | wgEncodeEH002851 | 100691   | 5584    | 2210                |
| GM12878 | ETS1    | Jaspar         | MA0098.2 | wgEncodeEH001564 | 1319961  | 4120    | 1416                |
| GM12878 | FOS     | Jaspar         | MA0476.1 | wgEncodeEH000622 | 762222   | 2239    | 94                  |
| GM12878 | JUND    | Jaspar         | MA0491.1 | wgEncodeEH000639 | 717223   | 2472    | 2012                |
| GM12878 | MAX     | Jaspar         | MA0058.2 | wgEncodeEH002806 | 855374   | 12542   | 1583                |
| GM12878 | MEF2A   | Jaspar         | MA0052.2 | wgEncodeEH001565 | 3210613  | 17605   | 6838                |
| GM12878 | MYC     | Jaspar         | MA0147.2 | wgEncodeEH000547 | 614797   | 3690    | 793                 |
| GM12878 | NFE2    | Jaspar         | MA0501.1 | wgEncodeEH001808 | 796063   | 772     | 33                  |
| GM12878 | NFYA    | Jaspar         | MA0060.2 | wgEncodeEH002064 | 428913   | 1841    | 1396                |
| GM12878 | NFYB    | Jaspar         | MA0502.1 | wgEncodeEH002065 | 470725   | 13295   | 11480               |
| GM12878 | NRF1    | Jaspar         | MA0506.1 | wgEncodeEH001846 | 137117   | 5683    | 8533                |
| GM12878 | REST    | Jaspar         | MA0138.2 | wgEncodeEH002314 | 629168   | 6906    | 3754                |
| GM12878 | PU1     | Jaspar         | MA0080.3 | wgEncodeEH001476 | 2040890  | 42938   | 39126               |
| GM12878 | RAD21   | Jaspar         | MA0139.1 | wgEncodeEH000749 | 565933   | 33085   | 29475               |
| GM12878 | RFX5    | Jaspar         | MA0510.1 | wgEncodeEH001810 | 629248   | 4341    | 943                 |
| GM12878 | SIX5    | Jaspar         | MA0088.1 | wgEncodeEH001542 | 1032447  | 4839    | 1872                |
| GM12878 | SMC3    | Jaspar         | MA0139.1 | wgEncodeEH001833 | 565933   | 30517   | 27056               |
| GM12878 | SP1     | Jaspar         | MA0079.3 | wgEncodeEH001496 | 1797400  | 18248   | 8151                |
| GM12878 | SRF     | Jaspar         | MA0083.2 | wgEncodeEH001464 | 1024023  | 8544    | 3651                |
| GM12878 | STAT1   | Jaspar         | MA0137.3 | wgEncodeEH001852 | 1272026  | 1769    | 67                  |
| GM12878 | STAT5A  | Jaspar         | MA0519.1 | wgEncodeEH002321 | 1292097  | 7423    | 335                 |

| Cell    | Factor | PFM Repository | PFM ID   | ChIP-seq ID      | # Motifs | # Peaks | # Motifs with Peaks |
|---------|--------|----------------|----------|------------------|----------|---------|---------------------|
| GM12878 | TR4    | Jaspar         | MA0504.1 | wgEncodeEH000697 | 825980   | 1263    | 475                 |
| GM12878 | USF2   | Jaspar         | MA0526.1 | wgEncodeEH001812 | 759040   | 9022    | 6480                |
| GM12878 | YY1    | Jaspar         | MA0095.2 | wgEncodeEH000695 | 1325447  | 2077    | 1333                |
| GM12878 | ZBTB33 | Jaspar         | MA0527.1 | wgEncodeEH001488 | 82928    | 2144    | 1919                |
| GM12878 | ZNF143 | Jaspar         | MA0088.1 | wgEncodeEH001853 | 1032447  | 20024   | 2866                |
| H1hesc  | ATF3   | Jaspar         | MA0093.2 | wgEncodeEH001566 | 691899   | 4804    | 2774                |
| H1hesc  | BACH1  | Transfac       | M00495   | wgEncodeEH002842 | 614421   | 11457   | 3442                |
| H1hesc  | BRCA1  | Jaspar         | MA0133.1 | wgEncodeEH002801 | 333055   | 2025    | 15                  |
| H1hesc  | CEBPB  | Jaspar         | MA0466.1 | wgEncodeEH002825 | 1342548  | 15557   | 10788               |
| H1hesc  | CTCF   | Jaspar         | MA0139.1 | wgEncodeEH001649 | 565933   | 54070   | 46540               |
| H1hesc  | EGR1   | Jaspar         | MA0162.2 | wgEncodeEH001538 | 1060314  | 8743    | 8515                |
| H1hesc  | FOSL1  | Jaspar         | MA0477.1 | wgEncodeEH001660 | 699220   | 1111    | 127                 |
| H1hesc  | GABP   | Jaspar         | MA0062.2 | wgEncodeEH001534 | 181503   | 5652    | 3020                |
| H1hesc  | JUN    | Jaspar         | MA0488.1 | wgEncodeEH001854 | 832374   | 2148    | 982                 |
| H1hesc  | JUND   | Jaspar         | MA0491.1 | wgEncodeEH002023 | 717223   | 9550    | 7368                |
| H1hesc  | MAFK   | Jaspar         | MA0496.1 | wgEncodeEH002828 | 1221488  | 11425   | 9083                |
| H1hesc  | MAX    | Jaspar         | MA0058.2 | wgEncodeEH001757 | 855374   | 11124   | 3558                |
| H1hesc  | MYC    | Jaspar         | MA0147.2 | wgEncodeEH002795 | 614797   | 4551    | 1507                |
| H1hesc  | NRF1   | Jaspar         | MA0506.1 | wgEncodeEH001847 | 137117   | 4513    | 7914                |
| H1hesc  | P300   | Jaspar         | MA0243.1 | wgEncodeEH001574 | 600191   | 8937    | 381                 |
| H1hesc  | POU5F1 | Jaspar         | MA0142.1 | wgEncodeEH001636 | 2201678  | 3994    | 3283                |
| H1hesc  | RAD21  | Jaspar         | MA0139.1 | wgEncodeEH001836 | 565933   | 55674   | 46626               |
| H1hesc  | REST   | Jaspar         | MA0138.2 | wgEncodeEH001498 | 629168   | 13269   | 6981                |
| H1hesc  | RFX5   | Jaspar         | MA0510.1 | wgEncodeEH001835 | 629248   | 1695    | 780                 |
| H1hesc  | RXRA   | Jaspar         | MA0512.1 | wgEncodeEH001560 | 1110004  | 1306    | 337                 |
| H1hesc  | SIX5   | Jaspar         | MA0088.1 | wgEncodeEH001528 | 1032447  | 3422    | 1929                |
| H1hesc  | SP1    | Jaspar         | MA0079.3 | wgEncodeEH001529 | 1797400  | 15103   | 7702                |
| H1hesc  | SP2    | Jaspar         | MA0516.1 | wgEncodeEH002302 | 1587339  | 2469    | 1784                |
| H1hesc  | SP4    | Uniprobe       | UP00002  | wgEncodeEH002317 | 503235   | 5752    | 2538                |
| H1hesc  | SRF    | Jaspar         | MA0083.2 | wgEncodeEH001533 | 1024023  | 5102    | 5466                |
| H1hesc  | TBP    | Jaspar         | MA0108.1 | wgEncodeEH001848 | 834532   | 17194   | 564                 |
| H1hesc  | TCF12  | Jaspar         | MA0521.1 | wgEncodeEH001531 | 893836   | 7829    | 2494                |
| H1hesc  | USF1   | Jaspar         | MA0093.2 | wgEncodeEH001532 | 691899   | 26028   | 25899               |
| H1hesc  | USF2   | Jaspar         | MA0526.1 | wgEncodeEH001837 | 759040   | 6952    | 6169                |
| H1hesc  | YY1    | Jaspar         | MA0095.2 | wgEncodeEH001567 | 1325447  | 18310   | 7308                |
| H1hesc  | ZNF143 | Jaspar         | MA0088.1 | wgEncodeEH002802 | 1032447  | 30687   | 4204                |

## References

- Buenrostro, J. D., Wu, B., Litzenburger, U. M., Ruff, D., Gonzales, M. L., Snyder, M. P., Chang, H. Y., and Greenleaf, W. J. (2015). Single-cell chromatin accessibility reveals principles of regulatory variation. *Nature*, 523(7561):486–90.
- Encode Consortium (2012). An integrated encyclopedia of DNA elements in the human genome. *Nature*, 489(7414):57–74.
- Lazarovici, A., Zhou, T., Shafer, A., Dantas Machado, A. C., Riley, T. R., Sandstrom, R., Sabo, P. J., Lu, Y., Rohs, R., Stamatoyannopoulos, J. A., and Bussemaker, H. J. (2013). Probing DNA shape and methylation state on a genomic scale with DNase I. *Proceedings of the National Academy of Sciences of the United States of America*, 110(16):6376–81.
- Mathelier, A., Zhao, X., Zhang, A. W., Parcy, F., Worsley-Hunt, R., Arenillas, D. J., Buchman, S., Chen, C. Y., Chou, A., Ienasescu, H., Lim, J., Shyr, C., Tan, G., Zhou, M., Lenhard, B., Sandelin, A., and Wasserman, W. W. (2014). JASPAR 2014: An extensively expanded and updated open-access database of transcription factor binding profiles. *Nucleic Acids Research*, 42(D1):D142—D147.
- Matys, V., Kel-Margoulis, O. V., Fricke, E., Liebich, I., Land, S., Barre-Dirrie, A., Reuter, I., Chekmenev, D., Krull, M., Hornischer, K., Voss, N., Stegmaier, P., Lewicki-Potapov, B., Saxel, H., Kel, A. E., and Wingender, E. (2006). TRANSFAC(R) and its module TRANSCOMP(R): transcriptional gene regulation in eukaryotes. *Nucl. Acids Res.*, 34(suppl\_1):D108–110.
- Piper, J., Elze, M. C., Cauchy, P., Cockerill, P. N., Bonifer, C., and Ott, S. (2013). Wellington: A novel method for the accurate identification of digital genomic footprints from DNase-seq data. *Nucleic Acids Research*, 41(21):e201.
- Quach, B. and Furey, T. S. (2016). Defcom: analysis and modeling of transcription factor binding sites using a motif-centric genomic footprinter. *Bioinformatics*, 33(7):956–963.
- Robasky, K. and Bulyk, M. L. (2011). UniPROBE, update 2011: Expanded content and search tools in the online database of protein-binding microarray data on protein-DNA interactions. *Nucleic Acids Research*, 39(SUPPL. 1).
- Schwessinger, R., Suci, M. C., McGowan, S. J., Telenius, J., Taylor, S., Higgs, D. R., and Hughes, J. R. (2017). Sasquatch: predicting the impact of regulatory snps on transcription factor binding from cell-and tissue-specific dnase footprints. *Genome research*.
- Sherwood, R. I., Hashimoto, T., O’Donnell, C. W., Lewis, S., Barkal, A. A., van Hoff, J. P., Karun, V., Jaakkola, T., and Gifford, D. K. (2014). Discovery of directional and nondirectional pioneer transcription factors by modeling DNase profile magnitude and shape. *Nature biotechnology*, 32(2):171–8.
- Sung, M. H., Guertin, M. J., Baek, S., and Hager, G. L. (2014). DNase footprint signatures are dictated by factor dynamics and DNA sequence. *Molecular Cell*, 56(2):275–285.
- Zhong, S. (2005). Semi-supervised sequence classification with hmms. *International Journal of Pattern Recognition and Artificial Intelligence*, 19(02):165–182.
